# Supplementary material
Source: PubMed Central journal article supplement (PMC7577230)
Supplement: mmc1.pdf [file mmc1.pdf]

## Online Appendices (1/3)

### Co-movements and spillovers of oil and renewable firms under extreme conditions: New evidence from negative WTI prices during COVID-19

---

#### Abstract

We test for the existence of volatility spillovers and co-movements among energy-focused corporations during the outbreak of the COVID-19 pandemic, inclusive of the April 2020 events where West Texas Intermediate (WTI) oil future prices became negative. Employing the spillover index approach; as well as developing a DCC-FIGARCH conditional correlation framework and using estimated spillover indices built on a generalised vector autoregressive framework in which forecast-error variance decompositions are invariant to the variable ordering, we examine the sectoral transmission mechanisms of volatility shocks and contagion throughout the energy sector. Among several results, we find positive and economically meaningful spillovers from falling oil prices to both renewable energy and coal markets. However, this result is only found for the narrow portion of our sample surrounding the negative WTI event. We interpret our results being directly attributed to a sharp drop in global oil, gas and coal demand, rather than because of a sudden increase in oil supply. While investors observed the US fracking industry losing market share to coal, they also viewed renewables as more reliable mechanism to generate long-term, stable and low-cost supply.

*Keywords:* Oil prices; Oil and gas corporations; Volatility spillovers; Volatility co-movement; Market linkage; Financial crisis; Contagion.

---

Table A1. List of Companies by Sector used in the above analysis

| A. Oil & Gas Exploration & Production |        |              |            |                                            |
|---------------------------------------|--------|--------------|------------|--------------------------------------------|
| Name (or Code)                        | RIC    | ISIN         | CUSIP/CINS | TRBC Sector                                |
| ConocoPhillips                        | COP    | US20825C1045 | 20825C104  | Oil & Gas Exploration and Production (NEC) |
| EOG Resources Inc                     | EOG    | US26875P1012 | 26875P101  | Oil & Gas Exploration and Production (NEC) |
| Occidental Petroleum Corp             | OXY    | US6745991058 | 674599105  | Oil & Gas Exploration and Production (NEC) |
| Pioneer Natural Resources Co          | PXD    | US7237871071 | 723787107  | Oil & Gas Exploration and Production (NEC) |
| Concho Resources Inc                  | CXO    | US20605P1012 | 20605P101  | Oil & Gas Exploration and Production (NEC) |
| Cabot Oil & Gas Corp                  | COG    | US1270971039 | 127097103  | Oil & Gas Exploration and Production (NEC) |
| Continental Resources Inc             | CLR    | US2120151012 | 212015101  | Oil & Gas Exploration and Production (NEC) |
| Apache Corp                           | APA    | US0374111054 | 37411105   | Oil & Gas Exploration and Production (NEC) |
| Marathon Oil Corp                     | MRO    | US5658491064 | 565849106  | Oil & Gas Exploration and Production (NEC) |
| Devon Energy Corp                     | DVN    | US25179M1036 | 25179M103  | Oil & Gas Exploration and Production (NEC) |
| Texas Pacific Land Trust              | TPL    | US8826101086 | 882610108  | Oil & Gas Exploration and Production (NEC) |
| Parsley Energy Inc                    | PE     | US7018771029 | 701877102  | Oil & Gas Exploration and Production (NEC) |
| EQT Corp                              | EQT    | US26884L1098 | 26884L109  | Oil & Gas Exploration and Production (NEC) |
| WPX Energy Inc                        | WPX    | US98212B1035 | 98212B103  | Oil & Gas Exploration and Production (NEC) |
| Cimarex Energy Co                     | XEC    | US1717981013 | 171798101  | Oil & Gas Exploration and Production (NEC) |
| CNX Resources Corp                    | CNX    | US12653C1080 | 12653C108  | Oil & Gas Exploration and Production (NEC) |
| Murphy Oil Corp                       | MUR    | US6267171022 | 626717102  | Oil & Gas Exploration and Production (NEC) |
| Southwestern Energy Co                | SWN    | US8454671095 | 845467109  | Oil & Gas Exploration and Production (NEC) |
| B. Oil & Gas Refining & Marketing     |        |              |            |                                            |
| Name (or Code)                        | RIC    | ISIN         | CUSIP/CINS | TRBC Sector                                |
| Exxon Mobil Corp                      | XOM    | US30231G1022 | 30231G102  | Oil & Gas Refining and Marketing (NEC)     |
| Chevron Corp                          | CVX    | US1667641005 | 166764100  | Petroleum Refining                         |
| Phillips 66                           | PSX    | US7185461040 | 718546104  | Oil & Gas Refining and Marketing (NEC)     |
| Valero Energy Corp                    | VLO    | US91913Y1001 | 91913Y100  | Oil & Gas Refining and Marketing (NEC)     |
| Marathon Petroleum Corp               | MPC    | US56585A1025 | 56585A102  | Oil & Gas Refining and Marketing (NEC)     |
| Hess Corp                             | HES    | US42809H1077 | 42809H107  | Oil & Gas Refining and Marketing (NEC)     |
| HollyFrontier Corp                    | HFC    | US4361061082 | 436106108  | Petroleum Refining                         |
| Murphy Usa Inc                        | MUSA.K | US6267551025 | 626755102  | Gasoline Stations                          |
| CVR Energy Inc                        | CVI    | US12662P1084 | 12662P108  | Petroleum Refining                         |
| Delek US Holdings Inc                 | DK     | US24665A1034 | 24665A103  | Petroleum Refining                         |
| World Fuel Services Corp              | INT    | US9814751064 | 981475106  | Petroleum Product Wholesale                |
| PBF Energy Inc                        | PBF    | US69318G1067 | 69318G106  | Oil & Gas Refining and Marketing (NEC)     |
| Par Pacific Holdings Inc              | PARR.K | US69888T2078 | 69888T207  | Oil & Gas Refining and Marketing (NEC)     |
| C. Integrated Oil & Gas               |        |              |            |                                            |
| Name (or Code)                        | RIC    | ISIN         | CUSIP/CINS | TRBC Sector                                |
| QEP Resources Inc                     | QEP    | US74733V1008 | 74733V100  | Integrated Oil & Gas                       |
| Mistras Group Inc                     | MG     | US60649T1079 | 60649T107  | Integrated Oil & Gas                       |
| D. Oil-related Service & Equipment    |        |              |            |                                            |
| Name (or Code)                        | RIC    | ISIN         | CUSIP/CINS | TRBC Sector                                |
| Schlumberger NV                       | SLB    | AN8068571086 | 806857108  | Oil Related Services and Equipment (NEC)   |
| Baker Hughes Co                       | BKR    | US05722G1004 | 05722G100  | Oil Related Services and Equipment (NEC)   |
| Halliburton Co                        | HAL    | US4062161017 | 406216101  | Oil Related Services and Equipment (NEC)   |
| National Oilwell Varco Inc            | NOV    | US6370711011 | 637071101  | Oil Related Services and Equipment (NEC)   |
| Antero Midstream Corp                 | AM     | US03676B1026 | 03676B102  | Oil Related Services and Equipment (NEC)   |
| Cactus Inc                            | WHD    | US1272031071 | 127203107  | Oil Related Services and Equipment (NEC)   |
| Dril-Quip Inc                         | DRQ    | US2620371045 | 262037104  | Oil Related Equipment                      |
| Archrock Inc                          | AROC.K | US03957W1062 | 03957W106  | Oil Related Services and Equipment (NEC)   |
| RPC Inc                               | RES    | US7496601060 | 749660106  | Oil Related Services and Equipment (NEC)   |
| Apergy Corp                           | APY    | US03755L1044 | 03755L104  | Oil Related Equipment                      |
| SEACOR Holdings Inc                   | CKH    | US8119041015 | 811904101  | Oil Related Services                       |
| Liberty Oilfield Services Inc         | LBRT.K | US53115L1044 | 53115L104  | Oil Related Services                       |
| Oceanenergy International Inc         | OII    | US6752321025 | 675232102  | Oil Related Services and Equipment (NEC)   |
| Select Energy Services Inc            | WTTR.K | US81617J3014 | 81617J301  | Oil Related Services                       |
| Nextier Oilfield Solutions Inc        | NEX    | US65290C1053 | 65290C105  | Oil Related Services                       |

Note: Data was obtained from Thomson Reuters Eikon.

Table A1. List of Companies by Sector used in the above analysis (continued)

| <i>E. Oil &amp; Gas Transportation Services</i> |         |              |            |                                         |
|-------------------------------------------------|---------|--------------|------------|-----------------------------------------|
| Name (or Code)                                  | RIC     | ISIN         | CUSIP/CINS | TRBC Sector                             |
| Kinder Morgan Inc                               | KMI     | US49456B1017 | 49456B101  | Oil & Gas Transportation Services (NEC) |
| Williams Companies Inc                          | WMB     | US9694571004 | 969457100  | Oil & Gas Transportation Services (NEC) |
| ONEOK Inc                                       | OKE     | US6826801036 | 682680103  | Oil & Gas Transportation Services (NEC) |
| Hess Midstream Operations LP                    | HESM.K  | US4281031058 | 428103105  | Oil & Gas Transportation Services (NEC) |
| Targa Resources Corp                            | TRGP.K  | US87612G1013 | 87612G101  | Oil & Gas Transportation Services (NEC) |
| Plains GP Holdings LP                           | PAGP.K  | US72651A2078 | 72651A207  | Oil & Gas Transportation Services (NEC) |
| Equitrans Midstream Corp                        | ETR.N.K | US2946001011 | 294600101  | Natural Gas Pipeline Transportation     |
| International Seaways Inc                       | INSW.K  | MHY410531021 | Y41053102  | Sea-Borne Tankers                       |
| Dorian LPG Ltd                                  | LPG     | MHY2106R1100 | Y2106R110  | Sea-Borne Tankers                       |
| Diamond S Shipping Inc                          | DSSI.K  | MHY206761055 | Y20676105  | Sea-Borne Tankers                       |
| Overseas Shipholding Group Inc                  | OSG     | US69036R8631 | 69036R863  | Sea-Borne Tankers                       |
| SEACOR Marine Holdings Inc                      | SMHI.K  | US78413P1012 | 78413P101  | Sea-Borne Tankers                       |
| <i>F. Oil &amp; Gas Drilling</i>                |         |              |            |                                         |
| Name (or Code)                                  | RIC     | ISIN         | CUSIP/CINS | TRBC Sector                             |
| Helmerich and Payne Inc                         | HP      | US4234521015 | 423452101  | Oil & Gas Drilling (NEC)                |
| Independence Contract Drilling Inc              | ICD     | US4534156066 | 453415606  | Oil & Gas Drilling (NEC)                |
| <i>G. Coal</i>                                  |         |              |            |                                         |
| Name (or Code)                                  | RIC     | ISIN         | CUSIP/CINS | TRBC Sector                             |
| Arch Coal Inc                                   | ARCH.K  | US0393804077 | 39380407   | Coal (NEC)                              |
| Peabody Energy Corp                             | BTU     | US7045511000 | 704551100  | Coal (NEC)                              |
| NACCO Industries Inc                            | NC      | US6295791031 | 629579103  | Coal (NEC)                              |
| CONSOL Energy Inc                               | CEIX.K  | US20854L1089 | 20854L108  | Coal (NEC)                              |
| Contura Energy Inc                              | CTRA.K  | US21241B1008 | 21241B100  | Coal (NEC)                              |
| <i>H. Renewable Energy</i>                      |         |              |            |                                         |
| Name (or Code)                                  | RIC     | ISIN         | CUSIP/CINS | TRBC Sector                             |
| Sunnova Energy International Inc                | NOVA.K  | US86745K1043 | 86745K104  | Photovoltaic Solar Systems & Equipment  |
| Ameresco Inc                                    | AMRC.K  | US02361E1082 | 2.36E+111  | Renewable Energy Services               |
| Vivint Solar Inc                                | VSLR.K  | US92854Q1067 | 92854Q106  | Photovoltaic Solar Systems & Equipment  |
| FutureFuel Corp                                 | FF      | US36116M1062 | 36116M106  | Biodiesel                               |
| REX American Resources Corp                     | REX     | US7616241052 | 761624105  | Ethanol Fuels                           |

Note: Data was obtained from Thomson Reuters Eikon.

Table A2. Hurst Exponents by Company &amp; Sector, Absolute Returns

| a) Oil & Gas Exploration                                               |      |      |      |      |      |      |      |      |      |      |      |      |      |      |      |      |      |
|------------------------------------------------------------------------|------|------|------|------|------|------|------|------|------|------|------|------|------|------|------|------|------|
| a)                                                                     | COP  | EOG  | OXY  | PXD  | CXO  | COG  | CLR  | APA  | MRO  | DVN  | TPL  | PE   | WPX  | XEC  | MUR  |      |      |
| Higuchi                                                                | 0.81 | 0.86 | 0.8  | 0.86 | 0.88 | 0.87 | 0.84 | 0.83 | 0.85 | 0.83 | 0.87 | 0.86 | 0.82 | 0.84 | 0.84 |      |      |
|                                                                        | 0.01 | 0.02 | 0.02 | 0.02 | 0.02 | 0.02 | 0.02 | 0.02 | 0.02 | 0.02 | 0.02 | 0.02 | 0.02 | 0.02 | 0.02 |      |      |
| Peng                                                                   | 0.67 | 0.55 | 0.51 | 0.58 | 0.7  | 0.59 | 0.57 | 0.46 | 0.53 | 0.6  | 0.64 | 0.59 | 0.59 | 0.65 | 0.65 |      |      |
|                                                                        | 0.08 | 0.09 | 0.1  | 0.1  | 0.05 | 0.06 | 0.09 | 0.09 | 0.09 | 0.09 | 0.07 | 0.08 | 0.11 | 0.08 | 0.08 |      |      |
| R/S                                                                    | 0.52 | 0.61 | 0.48 | 0.64 | 0.36 | 0.56 | 0.46 | 0.52 | 0.49 | 0.37 | 0.38 | 0.57 | 0.33 | 0.5  | 0.51 |      |      |
|                                                                        | 0.03 | 0.03 | 0.05 | 0.03 | 0.07 | 0.03 | 0.04 | 0.05 | 0.03 | 0.06 | 0.05 | 0.04 | 0.06 | 0.03 | 0.03 |      |      |
| Boxed P.                                                               | 0.5  | 0.62 | 0.72 | 0.81 | 0.64 | 0.71 | 0.71 | 0.73 | 0.69 | 0.63 | 0.67 | 0.72 | 0.88 | 0.61 | 0.77 |      |      |
|                                                                        | 0.1  | 0.08 | 0.05 | 0.06 | 0.07 | 0.08 | 0.06 | 0.05 | 0.05 | 0.07 | 0.08 | 0.06 | 0.05 | 0.07 | 0.06 |      |      |
| b) Oil & Gas Refining & Marketing                                      |      |      |      |      |      |      |      |      |      |      |      |      |      |      |      |      |      |
| b)                                                                     | XOM  | CVX  | PSX  | VLO  | MPC  | HES  | HFC  | MUSA | CVI  | DK   | INT  | PBF  | PARR |      |      |      |      |
| Higuchi                                                                | 0.81 | 0.77 | 0.8  | 0.83 | 0.83 | 0.84 | 0.85 | 0.85 | 0.82 | 0.86 | 0.84 | 0.83 | 0.76 |      |      |      |      |
|                                                                        | 0.02 | 0.02 | 0.02 | 0.02 | 0.02 | 0.02 | 0.02 | 0.02 | 0.02 | 0.02 | 0.02 | 0.02 | 0.01 |      |      |      |      |
| Peng                                                                   | 0.78 | 0.63 | 0.66 | 0.66 | 0.65 | 0.53 | 0.64 | 0.64 | 0.65 | 0.67 | 0.7  | 0.57 | 0.58 |      |      |      |      |
|                                                                        | 0.08 | 0.1  | 0.09 | 0.08 | 0.08 | 0.08 | 0.07 | 0.05 | 0.07 | 0.07 | 0.07 | 0.1  | 0.11 |      |      |      |      |
| R/S                                                                    | 0.45 | 0.59 | 0.54 | 0.56 | 0.54 | 0.57 | 0.41 | 0.42 | 0.45 | 0.46 | 0.35 | 0.44 | 0.75 |      |      |      |      |
|                                                                        | 0.05 | 0.03 | 0.03 | 0.04 | 0.03 | 0.03 | 0.05 | 0.04 | 0.04 | 0.06 | 0.07 | 0.05 | 0.03 |      |      |      |      |
| Boxed P.                                                               | 0.71 | 0.64 | 0.73 | 0.65 | 0.69 | 0.68 | 0.58 | 0.7  | 0.75 | 0.49 | 0.7  | 0.79 | 0.79 |      |      |      |      |
|                                                                        | 0.08 | 0.09 | 0.09 | 0.1  | 0.08 | 0.06 | 0.09 | 0.07 | 0.07 | 0.08 | 0.08 | 0.07 | 0.07 |      |      |      |      |
| c) & d) Integrated Oil & Gas, & Oil & Gas Transportation Services      |      |      |      |      |      |      |      |      |      |      |      |      |      |      |      |      |      |
| c)                                                                     | QEP  | MG   | d)   |      |      | KMI  | WMB  | OKE  | HESM | TRGP | PAGP | ETRN | INSW | LPG  | OSG  | SMHI |      |
| Higuchi                                                                | 0.83 | 0.79 |      |      |      | 0.75 | 0.77 | 0.7  | 0.72 | 0.78 | 0.74 | 0.85 | 0.86 | 0.9  | 0.89 | 0.83 |      |
|                                                                        | 0.02 | 0.01 |      |      |      | 0.02 | 0.02 | 0.02 | 0.02 | 0.02 | 0.02 | 0.02 | 0.02 | 0.03 | 0.02 | 0.02 |      |
| Peng                                                                   | 0.53 | 0.67 |      |      |      | 0.68 | 0.65 | 0.53 | 0.59 | 0.53 | 0.6  | 0.64 | 0.64 | 0.68 | 0.62 | 0.69 |      |
|                                                                        | 0.08 | 0.06 |      |      |      | 0.1  | 0.11 | 0.12 | 0.1  | 0.12 | 0.13 | 0.04 | 0.06 | 0.05 | 0.05 | 0.07 |      |
| R/S                                                                    | 0.57 | 0.61 |      |      |      | 0.63 | 0.54 | 0.61 | 0.54 | 0.52 | 0.64 | 0.73 | 0.55 | 0.52 | 0.55 | 0.7  |      |
|                                                                        | 0.01 | 0.02 |      |      |      | 0.04 | 0.05 | 0.03 | 0.05 | 0.06 | 0.03 | 0.02 | 0.03 | 0.04 | 0.04 | 0.03 |      |
| Boxed P.                                                               | 0.75 | 0.73 |      |      |      | 0.84 | 1.04 | 0.74 | 0.76 | 0.76 | 0.93 | 0.68 | 0.63 | 0.66 | 0.7  | 0.52 |      |
|                                                                        | 0.06 | 0.07 |      |      |      | 0.08 | 0.07 | 0.07 | 0.07 | 0.07 | 0.08 | 0.07 | 0.08 | 0.08 | 0.07 | 0.11 |      |
| e) Oil & Gas Services & Equipment                                      |      |      |      |      |      |      |      |      |      |      |      |      |      |      |      |      |      |
| e)                                                                     | SLB  | BKR  | HAL  | NOV  | AM   | WHD  | DRQ  | AROC | RES  | APY  | CKH  | LBRT | OII  | WTTR | NEX  |      |      |
| Higuchi                                                                | 0.84 | 0.86 | 0.83 | 0.86 | 0.87 | 0.84 | 0.9  | 0.83 | 0.89 | 0.79 | 0.85 | 0.87 | 0.84 | 0.84 | 0.86 |      |      |
|                                                                        | 0.02 | 0.02 | 0.02 | 0.02 | 0.02 | 0.02 | 0.03 | 0.02 | 0.02 | 0.02 | 0.02 | 0.02 | 0.02 | 0.02 | 0.02 |      |      |
| Peng                                                                   | 0.68 | 0.7  | 0.62 | 0.73 | 0.56 | 0.52 | 0.66 | 0.46 | 0.49 | 0.47 | 0.75 | 0.53 | 0.57 | 0.57 | 0.6  |      |      |
|                                                                        | 0.08 | 0.09 | 0.09 | 0.07 | 0.03 | 0.08 | 0.05 | 0.09 | 0.04 | 0.1  | 0.08 | 0.07 | 0.08 | 0.08 | 0.06 |      |      |
| R/S                                                                    | 0.35 | 0.5  | 0.52 | 0.37 | 0.65 | 0.78 | 0.43 | 0.53 | 0.45 | 0.56 | 0.58 | 0.7  | 0.35 | 0.65 | 0.53 |      |      |
|                                                                        | 0.05 | 0.05 | 0.03 | 0.06 | 0.02 | 0.06 | 0.05 | 0.05 | 0.06 | 0.02 | 0.02 | 0.02 | 0.07 | 0.04 | 0.04 |      |      |
| Boxed P.                                                               | 0.63 | 0.77 | 0.65 | 0.78 | 0.55 | 0.48 | 0.74 | 0.69 | 0.53 | 0.38 | 0.83 | 0.56 | 0.63 | 0.46 | 0.64 |      |      |
|                                                                        | 0.08 | 0.08 | 0.07 | 0.07 | 0.07 | 0.09 | 0.07 | 0.06 | 0.08 | 0.1  | 0.07 | 0.07 | 0.07 | 0.1  | 0.06 |      |      |
| f), g) and h) Oil & Gas Drilling, Coal & Renewable Energy respectively |      |      |      |      |      |      |      |      |      |      |      |      |      |      |      |      |      |
| f)                                                                     | HP   | ICD  | g)   |      |      | ARCH | BTU  | NC   | CEIX | CTRA | h)   |      |      | AMRC | VSLR | FF   | REX  |
| Higuchi                                                                | 0.83 | 0.82 |      |      |      | 0.84 | 0.83 | 0.87 | 0.8  | 0.8  |      |      |      | 0.82 | 0.89 | 0.93 | 0.84 |
|                                                                        | 0.02 | 0.01 |      |      |      | 0.02 | 0.01 | 0.02 | 0.01 | 0.01 |      |      |      | 0.02 | 0.02 | 0.03 | 0.02 |
| Peng                                                                   | 0.65 | 0.48 |      |      |      | 0.61 | 0.61 | 0.65 | 0.55 | 0.64 |      |      |      | 0.6  | 0.65 | 0.57 | 0.53 |
|                                                                        | 0.08 | 0.08 |      |      |      | 0.05 | 0.06 | 0.05 | 0.07 | 0.06 |      |      |      | 0.06 | 0.05 | 0.03 | 0.1  |
| R/S                                                                    | 0.67 | 0.7  |      |      |      | 0.5  | 0.52 | 0.8  | 0.43 | 0.67 |      |      |      | 0.54 | 0.69 | 0.46 | 0.69 |
|                                                                        | 0.02 | 0.03 |      |      |      | 0.04 | 0.04 | 0.04 | 0.05 | 0.04 |      |      |      | 0.04 | 0.03 | 0.06 | 0.03 |
| Boxed P.                                                               | 0.78 | 0.87 |      |      |      | 0.61 | 0.75 | 0.59 | 0.66 | 0.78 |      |      |      | 0.66 | 0.78 | 0.57 | 0.76 |
|                                                                        | 0.06 | 0.06 |      |      |      | 0.08 | 0.07 | 0.08 | 0.08 | 0.06 |      |      |      | 0.07 | 0.08 | 0.07 | 0.07 |

Note: The above data represents hourly sectoral price volatility for the period March 2019 through May 2020. Data was obtained from Thomson Reuters Eikon. All of the test statistics are significant at 95% confidence level

Table A3. Hurst Exponents by Company &amp; Sector, Squared Returns

| a) Oil & Gas Exploration                                               |      |      |      |      |      |      |      |       |      |      |      |      |      |      |      |
|------------------------------------------------------------------------|------|------|------|------|------|------|------|-------|------|------|------|------|------|------|------|
| a)                                                                     | COP  | EOG  | OXY  | PXD  | CXO  | COG  | CLR  | APA   | MRO  | DVN  | TPL  | PE   | WPX  | XEC  | MUR  |
| Higuchi                                                                | 0.48 | 0.61 | 0.37 | 0.59 | 0.79 | 0.73 | 0.57 | 0.49  | 0.55 | 0.56 | 0.64 | 0.60 | 0.47 | 0.60 | 0.56 |
|                                                                        | 0.07 | 0.05 | 0.11 | 0.06 | 0.03 | 0.03 | 0.07 | 0.08  | 0.07 | 0.06 | 0.04 | 0.05 | 0.08 | 0.05 | 0.06 |
| Peng                                                                   | 0.31 | 0.21 | 0.00 | 0.22 | 0.63 | 0.54 | 0.24 | 0.22  | 0.14 | 0.26 | 0.37 | 0.31 | 0.25 | 0.33 | 0.37 |
|                                                                        | 0.15 | 0.19 | 0.27 | 0.20 | 0.04 | 0.08 | 0.19 | 0.17  | 0.23 | 0.18 | 0.13 | 0.16 | 0.20 | 0.16 | 0.17 |
| R/S                                                                    | 0.54 | 0.62 | 0.48 | 0.61 | 0.46 | 0.51 | 0.47 | 0.62  | 0.46 | 0.42 | 0.41 | 0.52 | 0.34 | 0.54 | 0.59 |
|                                                                        | 0.02 | 0.02 | 0.04 | 0.03 | 0.05 | 0.03 | 0.03 | 0.03  | 0.03 | 0.05 | 0.05 | 0.05 | 0.06 | 0.02 | 0.03 |
| Boxed Per.                                                             | 0.50 | 0.60 | 0.56 | 0.67 | 0.61 | 0.75 | 0.59 | 0.60  | 0.56 | 0.58 | 0.55 | 0.64 | 0.70 | 0.60 | 0.63 |
|                                                                        | 0.10 | 0.06 | 0.05 | 0.06 | 0.07 | 0.09 | 0.05 | 0.05  | 0.05 | 0.06 | 0.10 | 0.06 | 0.07 | 0.06 | 0.06 |
| b) Oil & Gas Refining & Marketing                                      |      |      |      |      |      |      |      |       |      |      |      |      |      |      |      |
| b)                                                                     | XOM  | CVX  | PSX  | VLO  | MPC  | HES  | HFC  | MUSA  | CVI  | DK   | INT  | PBF  | PARR |      |      |
| Higuchi                                                                | 0.52 | 0.33 | 0.47 | 0.54 | 0.52 | 0.59 | 0.60 | 0.69  | 0.50 | 0.62 | 0.59 | 0.51 | 0.33 |      |      |
|                                                                        | 0.06 | 0.11 | 0.07 | 0.06 | 0.06 | 0.06 | 0.04 | 0.04  | 0.07 | 0.04 | 0.04 | 0.06 | 0.10 |      |      |
| Peng                                                                   | 0.52 | 0.18 | 0.38 | 0.38 | 0.30 | 0.22 | 0.45 | 0.55  | 0.41 | 0.37 | 0.45 | 0.28 | 0.12 |      |      |
|                                                                        | 0.12 | 0.18 | 0.16 | 0.13 | 0.15 | 0.17 | 0.11 | 0.04  | 0.15 | 0.13 | 0.11 | 0.18 | 0.21 |      |      |
| R/S                                                                    | 0.51 | 0.50 | 0.55 | 0.58 | 0.50 | 0.59 | 0.53 | 0.47  | 0.51 | 0.47 | 0.38 | 0.49 | 0.86 |      |      |
|                                                                        | 0.03 | 0.04 | 0.03 | 0.03 | 0.04 | 0.02 | 0.04 | 0.04  | 0.02 | 0.05 | 0.07 | 0.05 | 0.05 |      |      |
| Boxed Per.                                                             | 0.56 | 0.71 | 0.95 | 0.79 | 0.74 | 0.61 | 0.39 | 0.54  | 0.81 | 0.45 | 0.55 | 0.90 | 0.72 |      |      |
|                                                                        | 0.11 | 0.10 | 0.08 | 0.08 | 0.08 | 0.06 | 0.11 | 0.08  | 0.07 | 0.09 | 0.09 | 0.06 | 0.07 |      |      |
| c) & d) Integrated Oil & Gas, & Oil & Gas Transportation Services      |      |      |      |      |      |      |      |       |      |      |      |      |      |      |      |
| c)                                                                     | QEP  | MG   | d)   |      | KMI  | WMB  | OKE  | HESM  | TRGP | PAGP | ETRN | INSW | LPG  | OSG  | SMHI |
| c) Higuchi                                                             | 0.54 | 0.58 |      |      | 0.30 | 0.35 | 0.15 | 0.22  | 0.32 | 0.23 | 0.63 | 0.68 | 0.77 | 0.75 | 0.57 |
|                                                                        | 0.06 | 0.04 |      |      | 0.11 | 0.11 | 0.16 | 0.13  | 0.12 | 0.13 | 0.04 | 0.03 | 0.03 | 0.02 | 0.05 |
| Peng                                                                   | 0.27 | 0.53 |      |      | 0.21 | 0.26 | 0.05 | 0.12  | 0.04 | 0.12 | 0.45 | 0.51 | 0.54 | 0.56 | 0.53 |
|                                                                        | 0.16 | 0.08 |      |      | 0.20 | 0.19 | 0.24 | 0.22  | 0.24 | 0.24 | 0.10 | 0.09 | 0.08 | 0.08 | 0.10 |
| R/S                                                                    | 0.53 | 0.57 |      |      | 0.57 | 0.57 | 0.60 | 0.56  | 0.55 | 0.64 | 0.61 | 0.63 | 0.53 | 0.53 | 0.69 |
|                                                                        | 0.02 | 0.02 |      |      | 0.05 | 0.04 | 0.02 | 0.05  | 0.05 | 0.03 | 0.02 | 0.02 | 0.02 | 0.04 | 0.02 |
| Boxed Per.                                                             | 0.65 | 0.62 |      |      | 0.81 | 1.03 | 0.62 | 0.62  | 0.56 | 0.75 | 0.76 | 0.80 | 0.66 | 0.69 | 0.50 |
|                                                                        | 0.05 | 0.09 |      |      | 0.08 | 0.08 | 0.09 | 0.07  | 0.06 | 0.08 | 0.08 | 0.08 | 0.08 | 0.08 | 0.11 |
| e) Oil & Gas Services & Equipment                                      |      |      |      |      |      |      |      |       |      |      |      |      |      |      |      |
| e)                                                                     | SLB  | BKR  | HAL  | NOV  | AM   | WHD  | DRQ  | AROC  | RES  | APY  | CKH  | LBRT | OII  | WTTR | NEX  |
| Higuchi                                                                | 0.57 | 0.62 | 0.52 | 0.65 | 0.72 | 0.52 | 0.80 | 0.39  | 0.79 | 0.39 | 0.63 | 0.68 | 0.55 | 0.56 | 0.67 |
|                                                                        | 0.06 | 0.05 | 0.07 | 0.04 | 0.02 | 0.06 | 0.02 | 0.10  | 0.02 | 0.09 | 0.04 | 0.02 | 0.06 | 0.05 | 0.03 |
| Peng                                                                   | 0.37 | 0.45 | 0.23 | 0.50 | 0.35 | 0.19 | 0.64 | -0.12 | 0.43 | 0.11 | 0.59 | 0.36 | 0.33 | 0.22 | 0.43 |
|                                                                        | 0.15 | 0.14 | 0.17 | 0.13 | 0.08 | 0.18 | 0.06 | 0.21  | 0.07 | 0.19 | 0.14 | 0.10 | 0.13 | 0.14 | 0.10 |
| R/S                                                                    | 0.42 | 0.54 | 0.53 | 0.37 | 0.60 | 0.74 | 0.45 | 0.49  | 0.44 | 0.50 | 0.55 | 0.59 | 0.42 | 0.56 | 0.63 |
|                                                                        | 0.04 | 0.03 | 0.03 | 0.06 | 0.01 | 0.04 | 0.04 | 0.04  | 0.07 | 0.02 | 0.03 | 0.03 | 0.06 | 0.03 | 0.03 |
| Boxed Per.                                                             | 0.62 | 0.77 | 0.57 | 0.75 | 0.58 | 0.49 | 0.81 | 0.74  | 0.46 | 0.45 | 0.88 | 0.58 | 0.57 | 0.53 | 0.61 |
|                                                                        | 0.07 | 0.08 | 0.06 | 0.07 | 0.08 | 0.08 | 0.09 | 0.06  | 0.09 | 0.08 | 0.10 | 0.08 | 0.07 | 0.09 | 0.06 |
| f), g) and h) Oil & Gas Drilling, Coal & Renewable Energy respectively |      |      |      |      |      |      |      |       |      |      |      |      |      |      |      |
| f)                                                                     | HP   | ICD  | g)   |      | ARCH | BTU  | NC   | CEIX  | CTRA | h)   |      | AMRC | VSLR | FF   | REX  |
| Higuchi                                                                | 0.53 | 0.42 |      |      | 0.66 | 0.63 | 0.76 | 0.46  | 0.66 |      |      | 0.66 | 0.79 | 0.94 | 0.47 |
|                                                                        | 0.06 | 0.08 |      |      | 0.03 | 0.04 | 0.02 | 0.07  | 0.05 |      |      | 0.03 | 0.03 | 0.04 | 0.08 |
| Peng                                                                   | 0.38 | 0.07 |      |      | 0.41 | 0.56 | 0.56 | 0.30  | 0.55 |      |      | 0.41 | 0.55 | 0.51 | 0.09 |
|                                                                        | 0.14 | 0.16 |      |      | 0.09 | 0.08 | 0.04 | 0.13  | 0.12 |      |      | 0.09 | 0.08 | 0.02 | 0.20 |
| R/S                                                                    | 0.69 | 0.64 |      |      | 0.51 | 0.47 | 0.66 | 0.50  | 0.60 |      |      | 0.51 | 0.60 | 0.42 | 0.64 |
|                                                                        | 0.01 | 0.02 |      |      | 0.03 | 0.04 | 0.03 | 0.04  | 0.03 |      |      | 0.03 | 0.03 | 0.06 | 0.03 |
| Boxed Per.                                                             | 0.67 | 0.79 |      |      | 0.63 | 0.84 | 0.42 | 0.70  | 0.53 |      |      | 0.63 | 0.87 | 0.52 | 0.75 |
|                                                                        | 0.07 | 0.06 |      |      | 0.09 | 0.07 | 0.10 | 0.09  | 0.06 |      |      | 0.09 | 0.08 | 0.09 | 0.07 |

Note: The above data represents hourly sectoral price volatility for the period March 2019 through May 2020. Data was obtained from Thomson Reuters Eikon. All of the test statistics are significant at 95% confidence level

Table A4. Unit Root Test Results: ADF and PP Tests

| Tests            |     | CLc1    | COP     | EOG     | OXY     | PXD     | CXO     | COG     | CLR     | APA     | MRO     | DVN     | TPL     | PE      | WPX     |
|------------------|-----|---------|---------|---------|---------|---------|---------|---------|---------|---------|---------|---------|---------|---------|---------|
| Log returns      | ADF | -5.47   | -4.84   | -6.17   | -5.69   | -5.51   | -5.8    | -6.21   | -6.07   | -5.81   | -5.25   | -4.8    | -5.04   | -5.1    | -4.59   |
|                  | PP  | -260.02 | -450.69 | -368.03 | -356.31 | -417.92 | -368.93 | -328.1  | -356.9  | -330.92 | -358.94 | -334.89 | -423.15 | -364.31 | -393.23 |
| Absolute returns | ADF | -2.52   | -3.24   | -5.18   | -4.92   | -5.52   | -4.57   | -4.16   | -4.34   | -4.97   | -4.81   | -3.67   | -3.72   | -4.4    | -3.6    |
|                  | PP  | -231.77 | -354.97 | -295.12 | -253.77 | -234.9  | -288.89 | -339.81 | -225.62 | -297.46 | -225.52 | -275.84 | -228    | -266.5  | -187.09 |
| Squared returns  | ADF | -2.77   | -3.4    | -6.07   | -6.45   | -6.04   | -4.81   | -3.78   | -6.19   | -5.74   | -6.5    | -4.72   | -4.26   | -5.24   | -4.12   |
|                  | PP  | -294.23 | -402.23 | -324.63 | -327.2  | -284.72 | -302.83 | -389.88 | -276.3  | -344.19 | -293.38 | -308.22 | -286.41 | -303.34 | -284.47 |
| Tests            |     | XOM     | CVX     | PSX     | VLO     | MPC     | HES     | HFC     | MUSA    | CVI     | DK      | INT     | PBF     | PARR    | QEP     |
| Log returns      | ADF | -5.17   | -5.72   | -5.88   | -5.95   | -5.96   | -6.33   | -5.51   | -6.58   | -6.61   | -6.04   | -7.75   | -5.55   | -4.92   | -4.68   |
|                  | PP  | -432.11 | -473.54 | -386.58 | -360.49 | -413.84 | -388.57 | -362.97 | -394.15 | -415.36 | -357.96 | -448.97 | -395.15 | -377.81 | -323.22 |
| Absolute returns | ADF | -2.97   | -2.39   | -3.21   | -3.09   | -3.2    | -5.79   | -3.5    | -5.78   | -3.4    | -3.49   | -2.89   | -3.69   | -4.31   | -377.81 |
|                  | PP  | -277.5  | -354.39 | -203.41 | -248.42 | -404.66 | -248.76 | -321.79 | -14.62  | -226.91 | -332.8  | -302.36 | -178.71 | -14.81  | -248.6  |
| Squared returns  | ADF | -3.11   | -2.65   | -3.67   | -3.36   | -4.2    | -6.58   | -3.81   | -5.71   | -5.12   | -4.64   | -2.89   | -5.12   | -5.15   | -5.01   |
|                  | PP  | -405.19 | -444.66 | -150.77 | -293.55 | -443.58 | -268.5  | -355.31 | -326.7  | -186.37 | -359.19 | -371.3  | -122.48 | -379.87 | -316.3  |
| Tests            |     | HAL     | NOV     | AM      | WHD     | DRQ     | AROC.K  | RES     | APY     | CKH     | LBRT.K  | OII     | WTTR.K  | NEX     | KMI     |
| Log returns      | ADF | -4.47   | -6.27   | -4.68   | -6.03   | -8.13   | -5.51   | -7.2    | -5.38   | -6.89   | -5.91   | -6.6    | -6.51   | -5.66   | -5.84   |
|                  | PP  | -390.33 | -440.68 | -288.58 | -371.53 | -334.3  | -435.52 | -286.11 | -298.83 | -379.16 | -368.13 | -347.06 | -368.2  | -371.47 | -440.12 |
| Absolute returns | ADF | -3.24   | -4.52   | -5.43   | -4.1    | -4.38   | -4.05   | -6.59   | -2.94   | -3.14   | -4.01   | -3.94   | -3.04   | -5.15   | -3.16   |
|                  | PP  | -364.12 | -269.61 | -284.41 | -292.52 | -273.86 | -194.64 | -306    | -283.1  | -289.58 | -343.14 | -382.79 | -286.09 | -336.61 | -286.35 |
| Squared returns  | ADF | -4.11   | -5.22   | -4.71   | -5.46   | -4.88   | -5.04   | -6.71   | -4.05   | -3.85   | -3.15   | -4.82   | -3.43   | -6.29   | -3.5    |
|                  | PP  | -377.43 | -316.28 | -269.55 | -302.17 | -269.69 | -165.67 | -276.55 | -320.74 | -369.15 | -344.68 | -406.87 | -255.49 | -362.97 | -382.83 |

Note: Data was obtained from Thomson Reuters Eikon.

Table A5. Unit Root Test with Multiple Structural Breaks: Kapetanios (2005) Test

| a. Absolute Returns |                                                          |                                                              |                                                                  |                                                                    |                                                              |                                                              |                                                                  |                                                                  |                                                              |                                                                |                                                                |                                                              |                                                                |
|---------------------|----------------------------------------------------------|--------------------------------------------------------------|------------------------------------------------------------------|--------------------------------------------------------------------|--------------------------------------------------------------|--------------------------------------------------------------|------------------------------------------------------------------|------------------------------------------------------------------|--------------------------------------------------------------|----------------------------------------------------------------|----------------------------------------------------------------|--------------------------------------------------------------|----------------------------------------------------------------|
|                     | Cic1                                                     | COP                                                          | XOM                                                              | CVX                                                                | PSX                                                          | VLO                                                          | MPC                                                              | CVI                                                              | INT                                                          | MG                                                             | SLB                                                            | BKR                                                          |                                                                |
| t stat              | -16.1515                                                 | -20.7258                                                     | -10.8656                                                         | -9.461                                                             | -13.1969                                                     | -11.7074                                                     | -12.0913                                                         | -10.2493                                                         | -13.7037                                                     | -10.1561                                                       | -16.6522                                                       | -15.675                                                      |                                                                |
| Break Dates         | 05/21/19<br>09/18/19<br>03/05/20<br>03/20/20<br>04/09/20 | 07/24/19<br>09/17/19<br>12/09/2019<br>03/06/2020<br>04/16/20 | 07/31/19<br>01/30/20<br>02/21/20<br>03/25/20<br>04/14/20         | 02/04/2019<br>06/07/2019<br>12/17/2019<br>02/10/2020<br>03/06/2020 | 01/30/20<br>02/20/20<br>03/06/2020<br>03/26/20<br>04/14/20   | 01/30/20<br>02/20/20<br>03/06/2020<br>03/26/20<br>04/14/20   | 11/04/2019<br>01/30/20<br>02/21/20<br>03/10/2020<br>04/15/20     | 05/07/2019<br>08/01/2019<br>02/07/2020<br>03/06/2020<br>03/26/20 | 04/23/19<br>05/22/19<br>07/24/19<br>12/17/19<br>03/06/2020   | 07/25/19<br>10/09/2019<br>11/07/2019<br>02/21/20<br>04/01/2020 | 11/01/2019<br>03/19/20<br>03/03/2020<br>11/18/19<br>04/09/2020 | 06/24/19<br>07/31/19<br>02/20/20<br>03/06/2020<br>04/16/20   | 10/08/2019<br>12/23/19<br>02/10/2020<br>03/06/2020<br>04/16/20 |
|                     | HAL                                                      | APY                                                          | CKH                                                              | WTTR                                                               | KMI                                                          | OKE                                                          | HESM                                                             | TRGP                                                             | LPG                                                          | SMHI                                                           | HP                                                             | ARCH                                                         |                                                                |
| t stat              | -12.8991                                                 | -21.6845                                                     | -22.3074                                                         | -14.064                                                            | -17.9327                                                     | -14.075                                                      | -16.6506                                                         | -15.689                                                          | -11.3513                                                     | -15.1394                                                       | -19.4168                                                       | -11.3754                                                     |                                                                |
| Break Dates         | 07/16/19<br>12/17/19<br>02/12/20<br>03/05/20<br>04/09/20 | 11/05/2019<br>12/26/19<br>02/20/20<br>03/06/2020<br>04/14/20 | 11/04/2019<br>02/11/2020<br>03/04/2020<br>03/19/20<br>04/06/2020 | 04/29/19<br>02/11/2020<br>03/06/2020<br>03/30/20<br>04/15/20       | 04/17/19<br>01/22/20<br>02/12/2020<br>03/06/2020<br>03/25/20 | 04/17/19<br>09/03/2019<br>02/14/20<br>03/05/2020<br>03/20/20 | 07/30/19<br>07/29/19<br>11/08/2019<br>03/06/2020<br>04/02/2020   | 01/24/19<br>02/19/20<br>03/06/2020<br>03/06/2020<br>04/15/20     | 09/24/19<br>06/19/19<br>09/04/2019<br>03/06/2020<br>04/16/20 | 05/22/19<br>04/18/19<br>09/27/19<br>03/02/2020<br>03/17/20     | 01/28/19<br>02/10/2020<br>03/03/2020<br>03/18/20<br>04/08/2020 | 02/13/19<br>11/12/2019<br>01/13/20<br>03/06/2020<br>03/27/20 |                                                                |
| b. Squared Returns  |                                                          |                                                              |                                                                  |                                                                    |                                                              |                                                              |                                                                  |                                                                  |                                                              |                                                                |                                                                |                                                              |                                                                |
|                     | Cic1                                                     | COP                                                          | XOM                                                              | CVX                                                                | PSX                                                          | VLO                                                          | INT                                                              | LBRT                                                             | SMHI                                                         | ARCH                                                           |                                                                |                                                              |                                                                |
| t stat              | -17.3662                                                 | -33.763                                                      | -19.8078                                                         | -9.448                                                             | -14.9214                                                     | -29.4751                                                     | -15.4428                                                         | -14.1563                                                         | -14.5567                                                     | -9.3443                                                        |                                                                |                                                              |                                                                |
| Break Dates         | 08/14/19<br>09/25/19<br>03/05/20<br>03/26/20<br>04/14/20 | 08/01/2019<br>02/20/20<br>03/06/2020<br>03/27/20<br>04/16/20 | 02/05/2019<br>08/29/19<br>09/25/19<br>03/06/2020<br>03/25/20     | 12/20/19<br>02/13/20<br>03/06/2020<br>03/26/20<br>04/16/20         | 04/23/19<br>01/30/20<br>02/20/20<br>03/06/2020<br>04/14/20   | 01/30/20<br>02/21/20<br>02/20/20<br>03/26/20<br>04/15/20     | 03/01/2019<br>04/22/19<br>03/11/2020<br>03/06/2020<br>04/01/2020 | 06/11/2019<br>08/30/19<br>12/30/19<br>03/04/2020<br>04/16/20     | 01/31/19<br>09/09/2019<br>09/19/19<br>03/23/20<br>04/16/20   | 07/31/19<br>08/15/19<br>11/12/2019<br>03/06/2020<br>04/15/20   |                                                                |                                                              |                                                                |

Note: Data was obtained from Thomson Reuters Eikon. All of the test statistics are significant at 95% confidence level

Table A6. DCC-FIGARCH: AIC and SC Results

|        |        |        |        |        |        |       |        |       |       |       |       |        |        |       |        |        |        |
|--------|--------|--------|--------|--------|--------|-------|--------|-------|-------|-------|-------|--------|--------|-------|--------|--------|--------|
| CLc1   | COP    | CLc1   | EOG    | CLc1   | OXY    | CLc1  | PXD    | CLc1  | CXO   | CLc1  | COG   | CLc1   | CLR    | CLc1  | APA    | CLc1   | XOM    |
| AIC    | SC     | AIC    | SC     | AIC    | SC     | AIC   | SC     | AIC   | SC    | AIC   | SC    | AIC    | SC     | AIC   | SC     | AIC    | SC     |
| -10.1  | -9.97  | -10.02 | -9.9   | -9.84  | -9.71  | -9.83 | -9.71  | -9.22 | -9.1  | -9.85 | -9.72 | -9.26  | -9.13  | -9.03 | -8.9   | -11.07 | -10.95 |
| CLc1   | MRO    | CLc1   | DVN    | CLc1   | TPL    | CLc1  | PE     | CLc1  | WPX   | CLc1  | XEC   | CLc1   | MUR    | CLc1  | SWN    | CLc1   | MPC    |
| AIC    | SC     | AIC    | SC     | AIC    | SC     | AIC   | SC     | AIC   | SC    | AIC   | SC    | AIC    | SC     | AIC   | SC     | AIC    | SC     |
| -9.77  | -9.64  | -9.63  | -9.5   | -9.66  | -9.54  | -9.28 | -9.15  | -9.43 | -9.31 | -9.49 | -9.37 | -9.41  | -9.28  | -8.94 | -8.82  | -9.74  | -9.62  |
| CLc1   | HFC    | CLc1   | MUSA   | CLc1   | CVI    | CLc1  | DK     | CLc1  | INT   | CLc1  | PBF   | CLc1   | PARR   | CLc1  | QEP    | CLc1   | AROC.K |
| AIC    | SC     | AIC    | SC     | AIC    | SC     | AIC   | SC     | AIC   | SC    | AIC   | SC    | AIC    | SC     | AIC   | SC     | AIC    | SC     |
| -10.08 | -9.95  | -9.37  | -9.25  | -9.91  | -9.78  | -9.37 | -9.25  | -9.81 | -9.68 | -9.26 | -9.13 | -10.12 | -9.99  | -8.35 | -8.23  | -9.52  | -9.39  |
| CLc1   | SLB    | CLc1   | BKR    | CLc1   | HAL    | CLc1  | NOV    | CLc1  | AM    | CLc1  | WHD   | CLc1   | DRQ    | CLc1  | LBRT.K | CLc1   | OIH    |
| AIC    | SC     | AIC    | SC     | AIC    | SC     | AIC   | SC     | AIC   | SC    | AIC   | SC    | AIC    | SC     | AIC   | SC     | AIC    | SC     |
| -9.82  | -9.69  | -9.93  | -9.8   | -9.67  | -9.55  | -9.32 | -9.19  | -9.04 | -8.92 | -9.73 | -9.6  | -9.43  | -9.3   | -9.08 | -8.96  | -8.55  | -9.01  |
| CLc1   | WMB    | CLc1   | OKE    | CLc1   | HESM.K | CLc1  | TRGP.K | CLc1  | HP    | CLc1  | ICD   | CLc1   | ARCH.K | CLc1  | BTU    | CLc1   | NC     |
| AIC    | SC     | AIC    | SC     | AIC    | SC     | AIC   | SC     | AIC   | SC    | AIC   | SC    | AIC    | SC     | AIC   | SC     | AIC    | SC     |
| -10.7  | -10.57 | -10.67 | -10.55 | -10.03 | -9.9   | -9.75 | -9.62  | -9.69 | -9.56 | -7.96 | -7.84 | -9.34  | -9.21  | -8.36 | -8.23  | -9.39  | -9.26  |

Note: Data was obtained from Thomson Reuters Eikon.



Figure A1. Sensitivity of the index to the VAR lag structure (max, min and median values of the index).

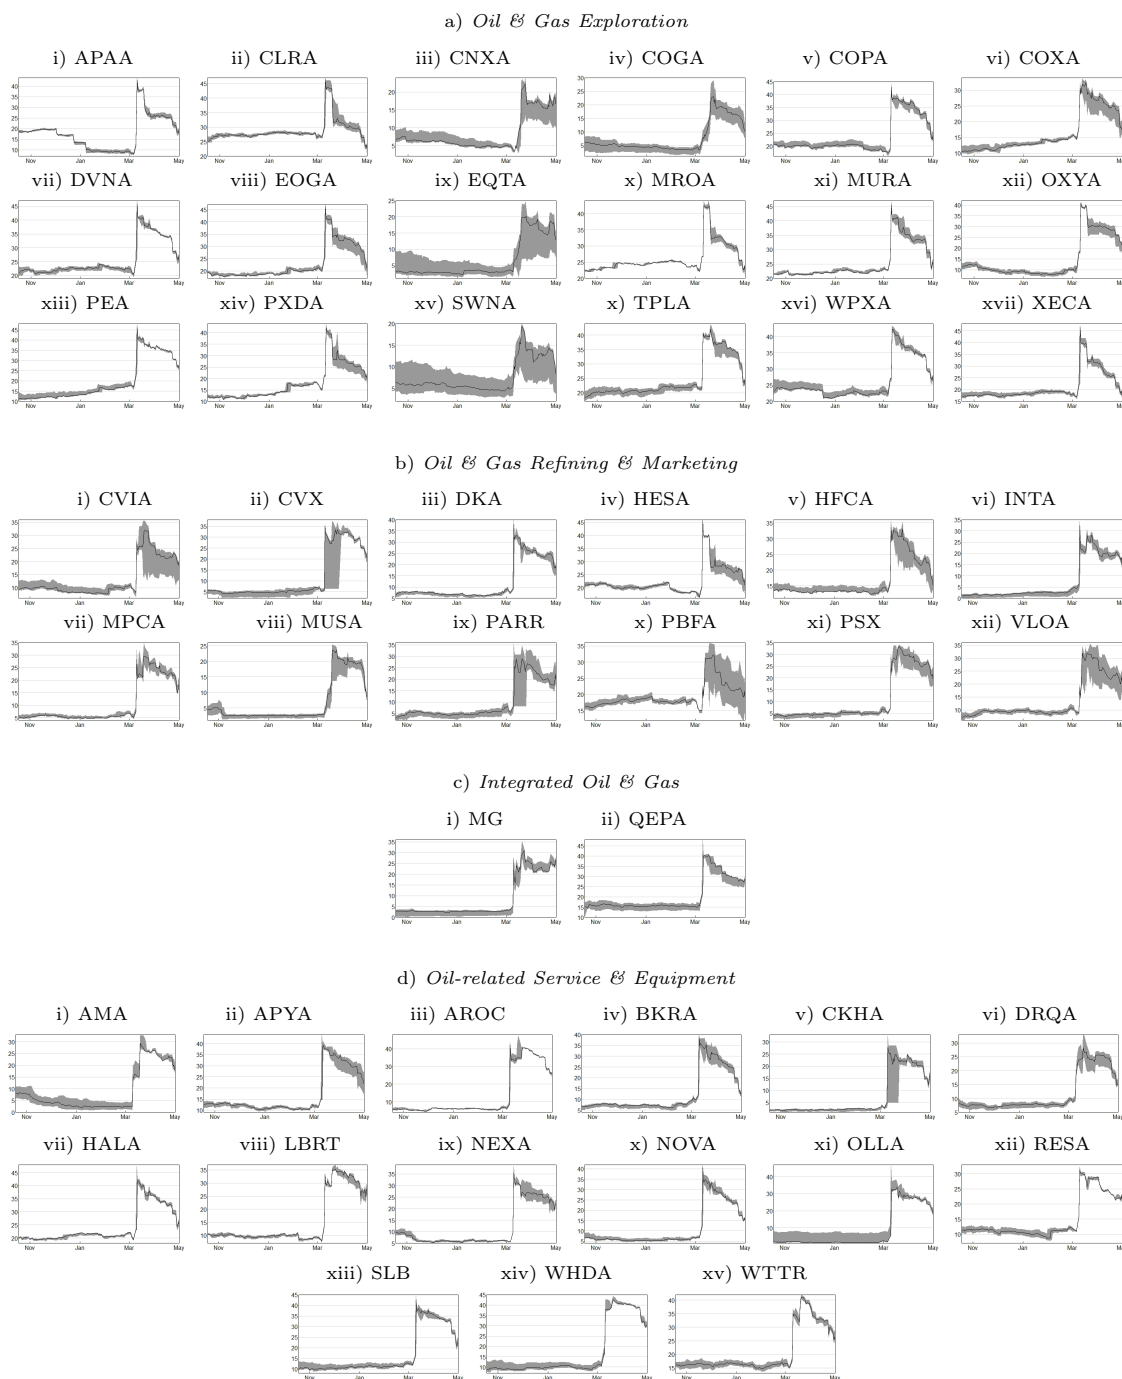

Note: The above figure presents the total spillover plot is not sensitive to the choice of the order of the VAR or the choice of the forecast horizon. For brevity and presentation purposes, only significant results are presented. Further results at varying time-frequencies and variation of methodological structure are available from the authors on request.

Figure A1 (continued). Sensitivity of the index to the VAR lag structure (max, min and median values of the index).

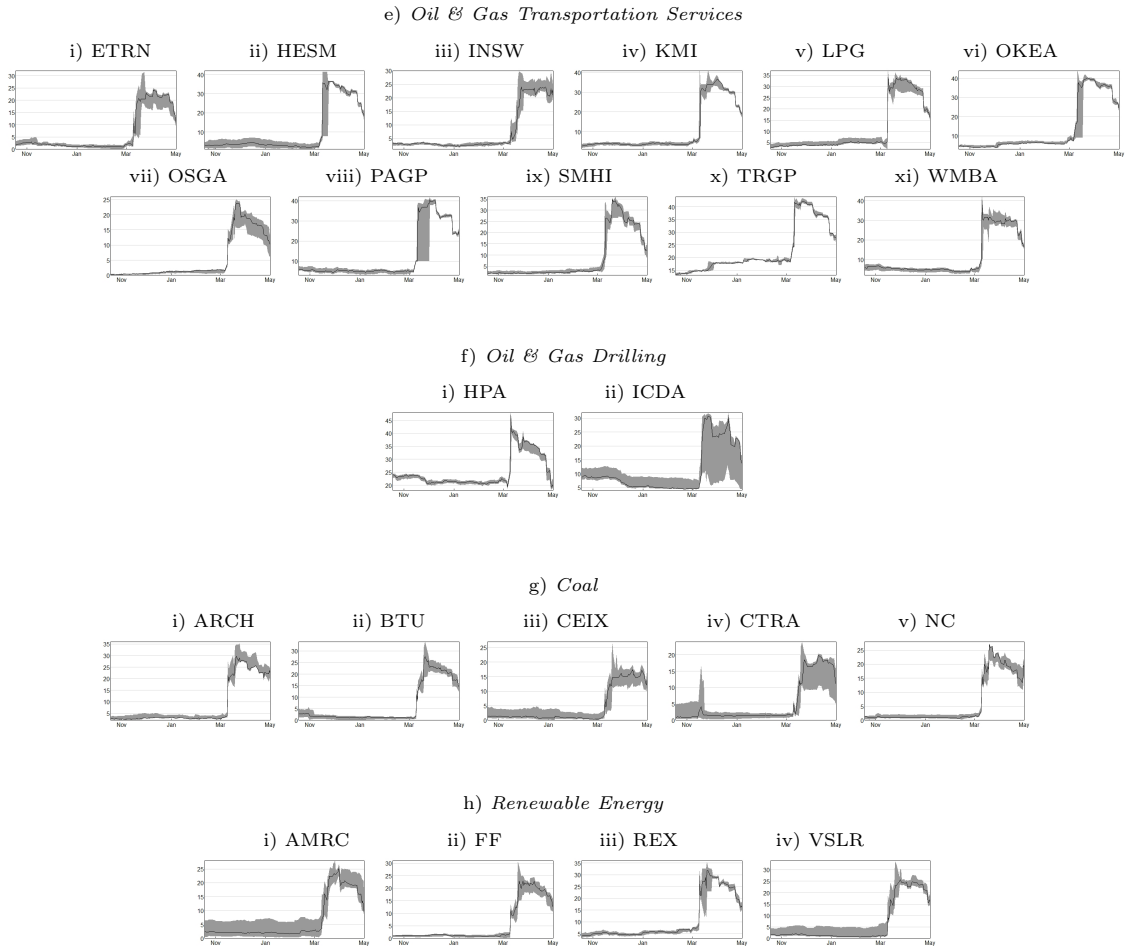

Note: The above figure presents the total spillover plot is not sensitive to the choice of the order of the VAR or the choice of the forecast horizon. For brevity and presentation purposes, only significant results are presented. Further results at varying time-frequencies and variation of methodological structure are available from the authors on request.

Figure A2. Sensitivity of the index to the forecast horizon (min, max and median values over 5- to 10-day horizons)

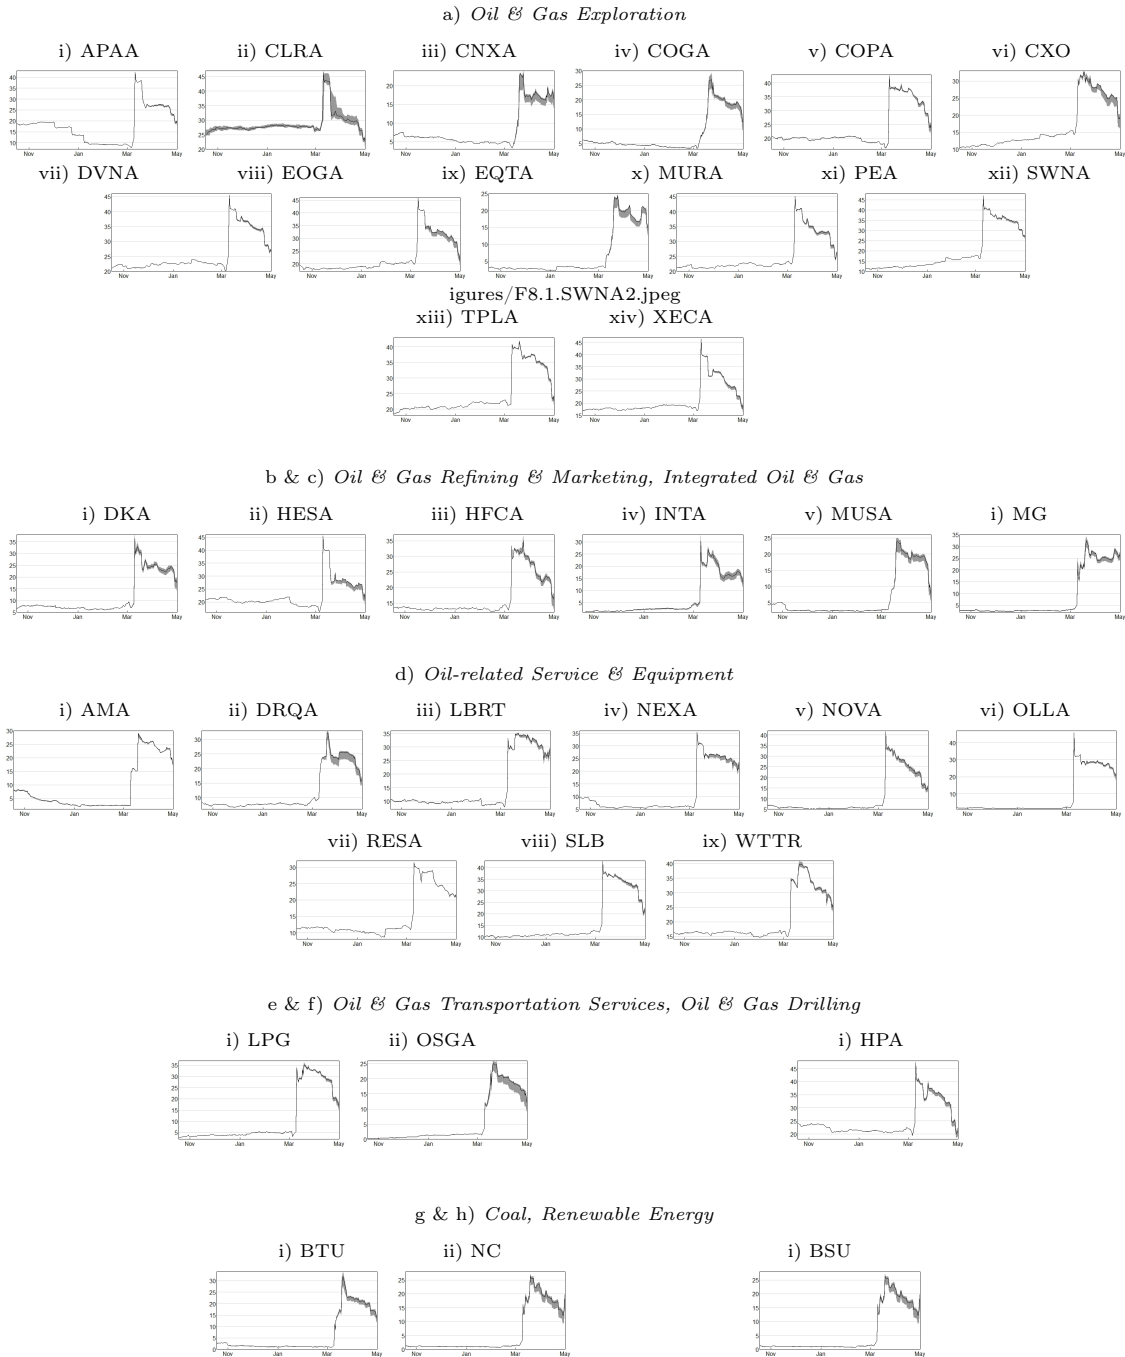

Note: The above figure presents the total spillover plot is not sensitive to the choice of the order of the VAR or the choice of the forecast horizon. For brevity and presentation purposes, only significant results are presented. Further results at varying time-frequencies and variation of methodological structure are available from the authors on request.

Figure B1: Total Directional Volatility Spillovers from WTI onto each Analysed Sector, absolute returns, 200-day windows

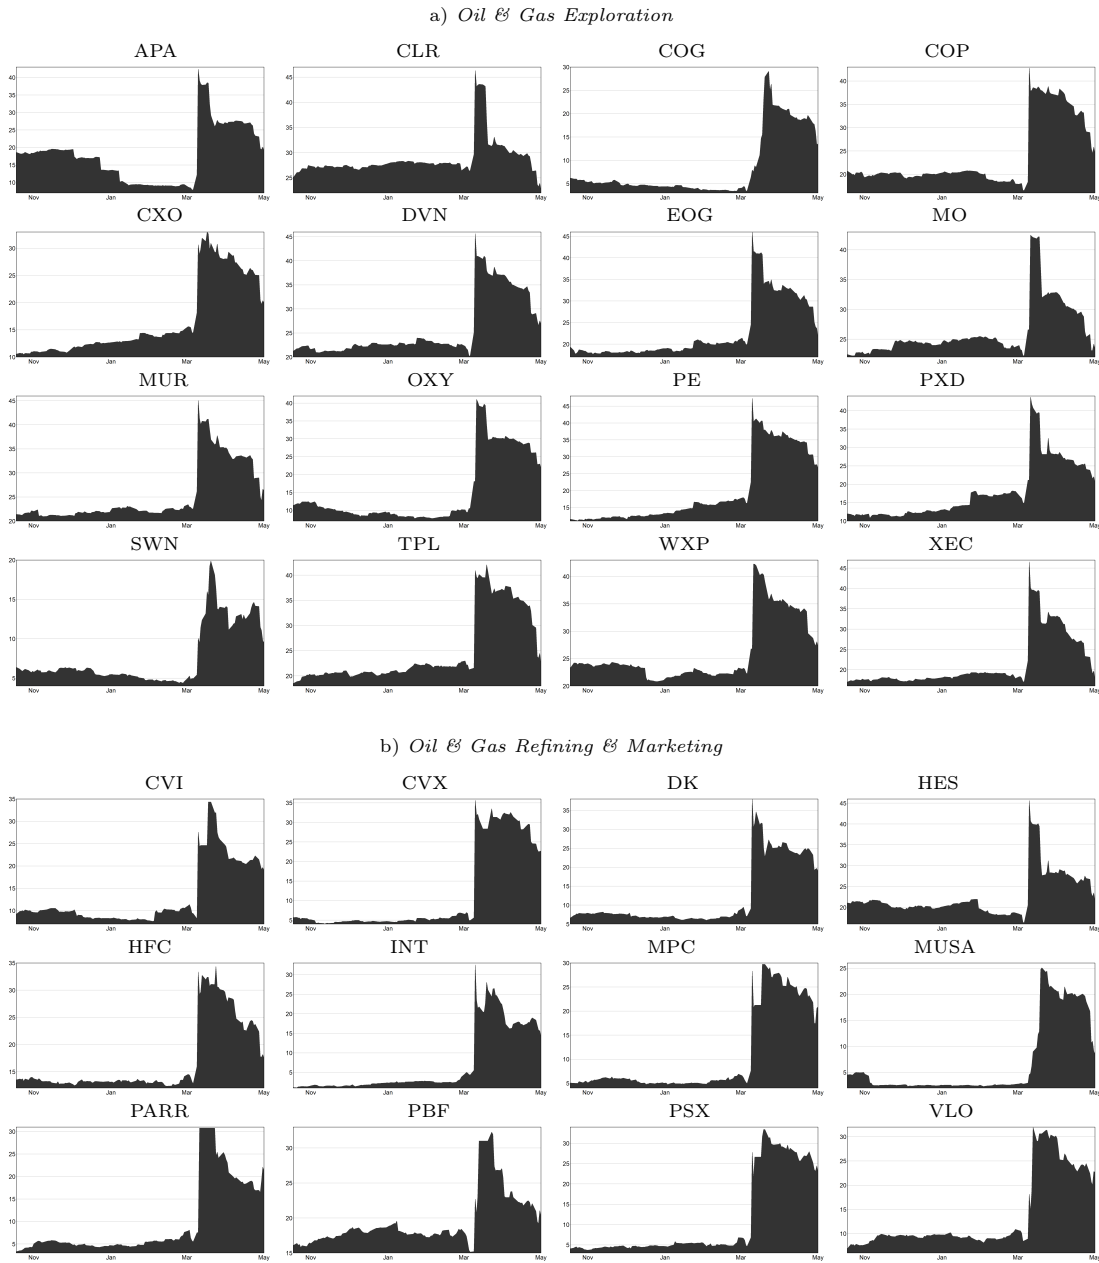

Note: The above Figure represents the total directional volatility spillovers from WTI upon each stated energy sector. To examine spillovers in the volatility of WTI during the outbreak of the COVID-19 pandemic and the subsequent effects of negative oil prices, and the effects of each event on energy-companies in the US, we apply the generalised version of the spillover index.

Figure B1: Total Directional Volatility Spillovers from WTI onto each Analysed Sector, absolute returns, 200-day windows

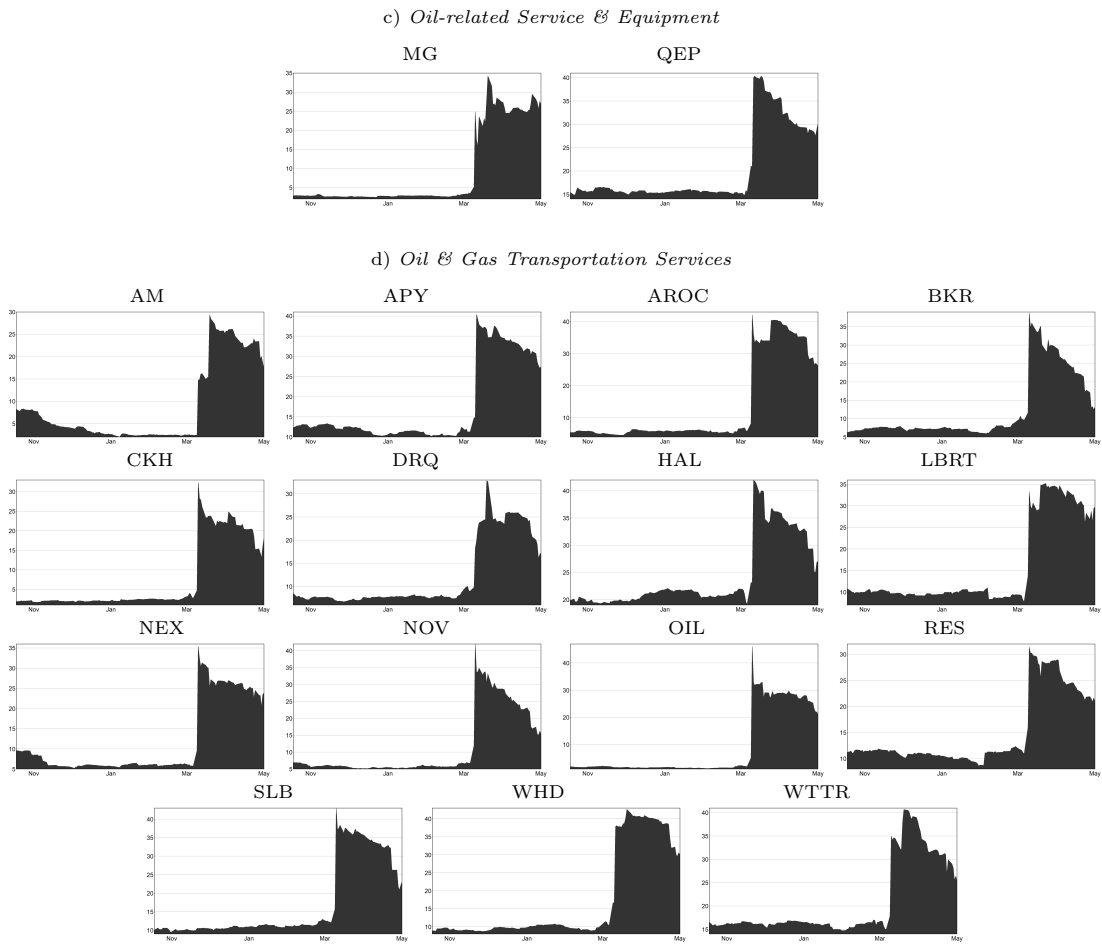

Note: The above Figure represents the total directional volatility spillovers from WTI upon each stated energy sector. To examine spillovers in the volatility of WTI during the outbreak of the COVID-19 pandemic and the subsequent effects of negative oil prices, and the effects of each event on energy-companies in the US, we apply the generalised version of the spillover index.

Figure B1: Total Directional Volatility Spillovers from WTI onto each Analysed Sector, absolute returns, 200-day windows

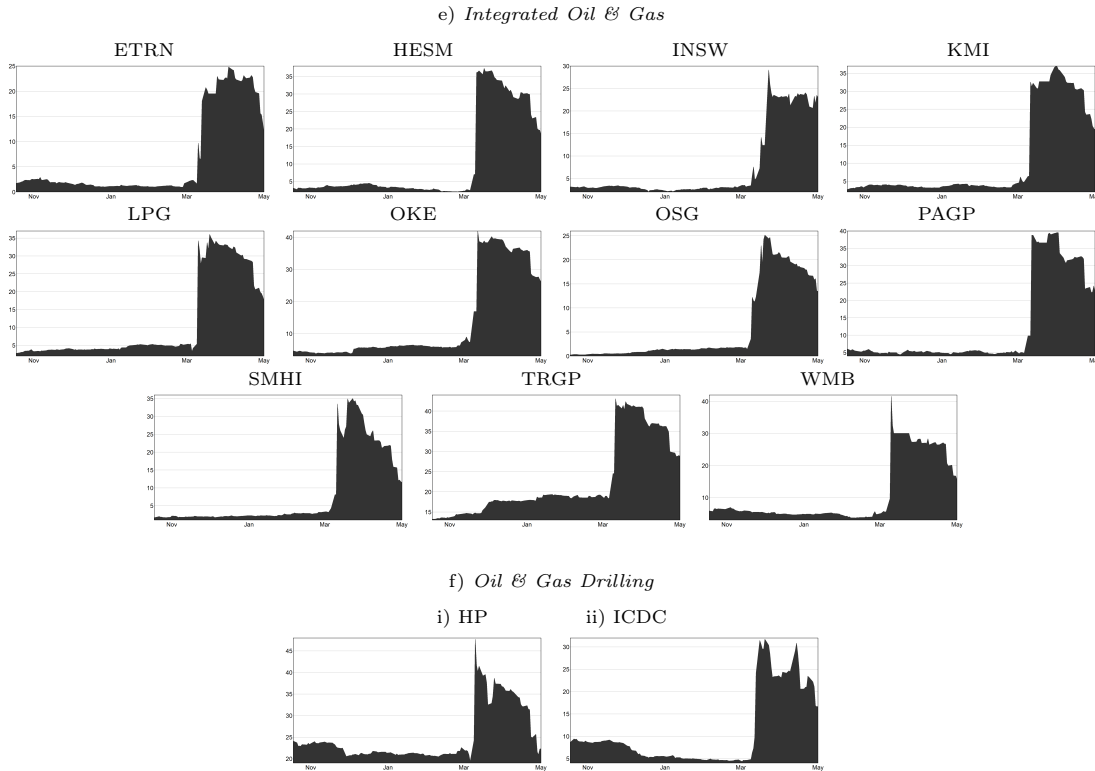

Note: The above Figure represents the total directional volatility spillovers from WTI upon each stated energy sector. To examine spillovers in the volatility of WTI during the outbreak of the COVID-19 pandemic and the subsequent effects of negative oil prices, and the effects of each event on energy-companies in the US, we apply the generalised version of the spillover index.

Figure B1: Total Directional Volatility Spillovers from WTI onto each Analysed Sector, absolute returns, 200-day windows

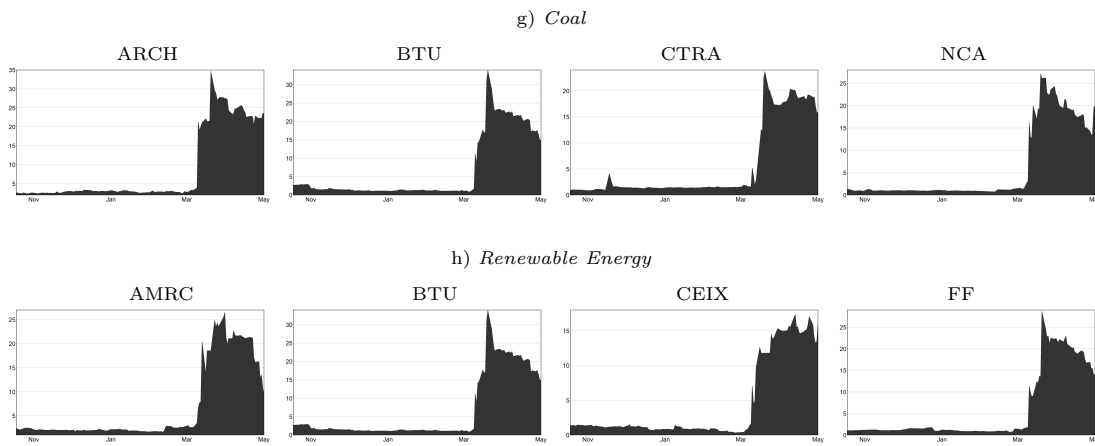

Note: The above Figure represents the total directional volatility spillovers from WTI upon each stated energy sector. To examine spillovers in the volatility of WTI during the outbreak of the COVID-19 pandemic and the subsequent effects of negative oil prices, and the effects of each event on energy-companies in the US, we apply the generalised version of the spillover index.

Figure B2: Total Directional Volatility Spillovers to WTI from each Analysed Sector, absolute returns, 200-day windows

a) Oil & Gas Exploration

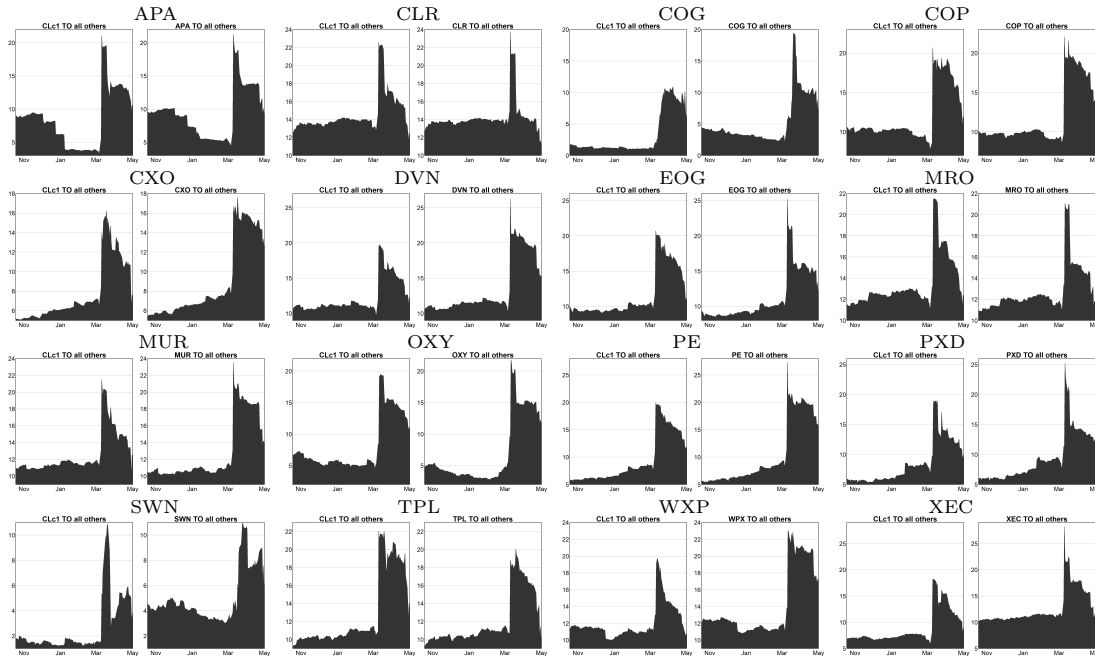

b) Oil & Gas Refining & Marketing

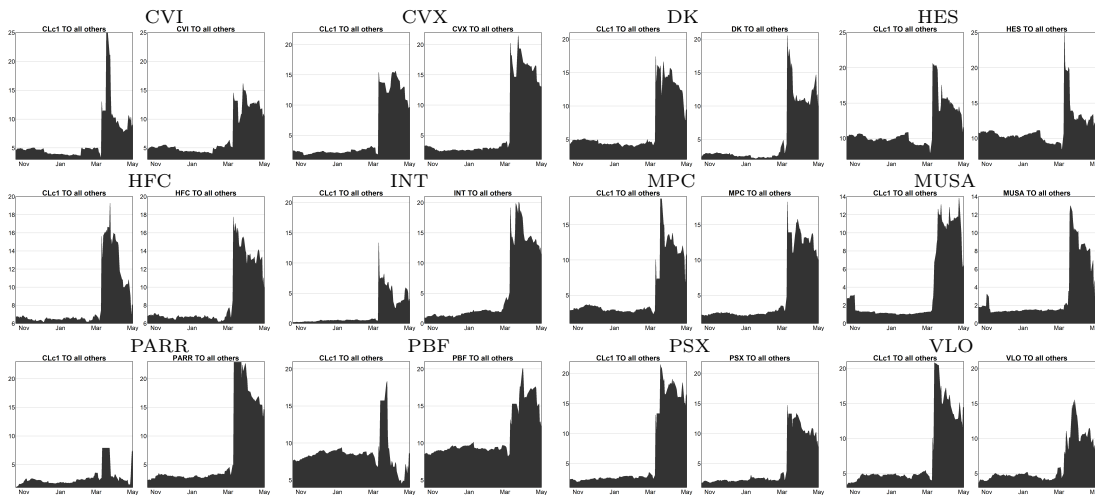

Note: The above Figure represents the total directional volatility spillovers from WTI upon each stated energy sector. To examine spillovers in the volatility of WTI during the outbreak of the COVID-19 pandemic and the subsequent effects of negative oil prices, and the effects of each event on energy-companies in the US, we apply the generalised version of the spillover index.



Figure B2: Total Directional Volatility Spillovers to WTI from each Analysed Sector, absolute returns, 200-day windows (continued)

c) *Oil-related Service & Equipment*

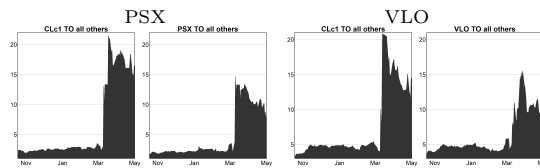

d) *Oil & Gas Transportation Services*

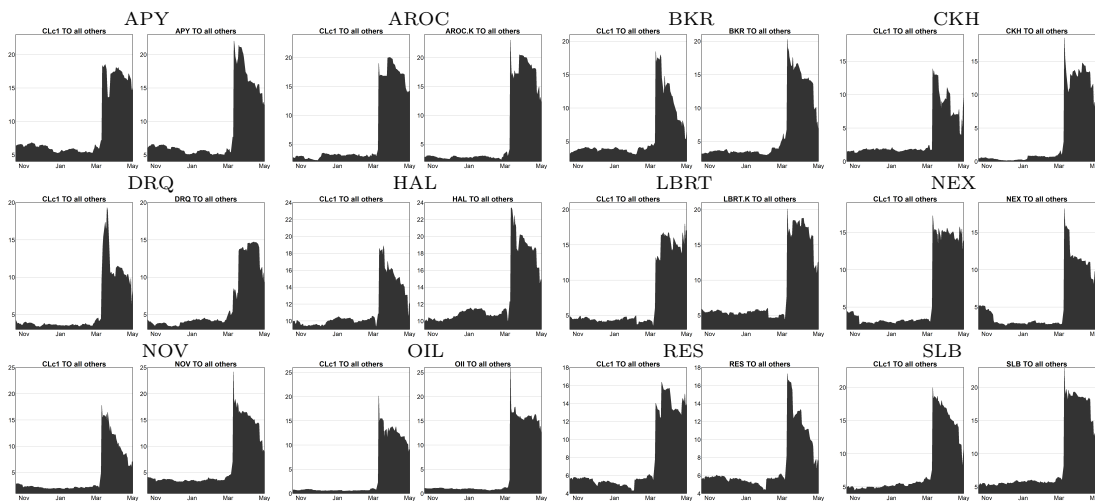

Note: The above Figure represents the total directional volatility spillovers from WTI upon each stated energy sector. To examine spillovers in the volatility of WTI during the outbreak of the COVID-19 pandemic and the subsequent effects of negative oil prices, and the effects of each event on energy-companies in the US, we apply the generalised version of the spillover index.

Figure B2: Total Directional Volatility Spillovers to WTI from each Analysed Sector (continued)

e) *Integrated Oil & Gas*

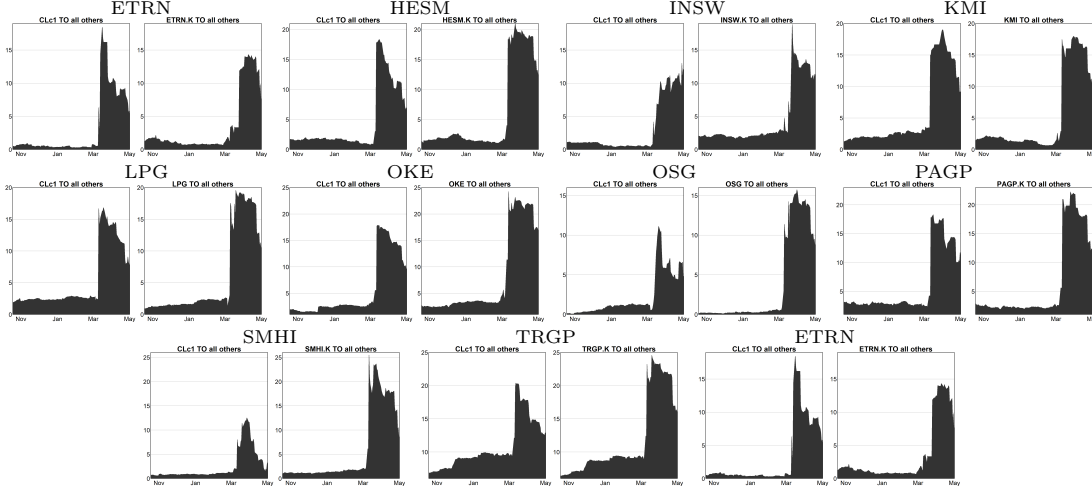

f) *Oil & Gas Drilling*

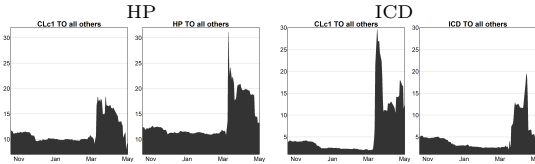

g) *Coal*

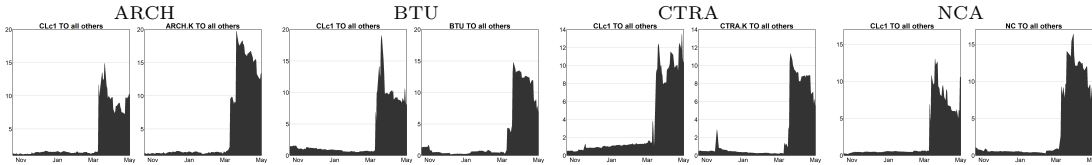

h) *Renewable Energy*

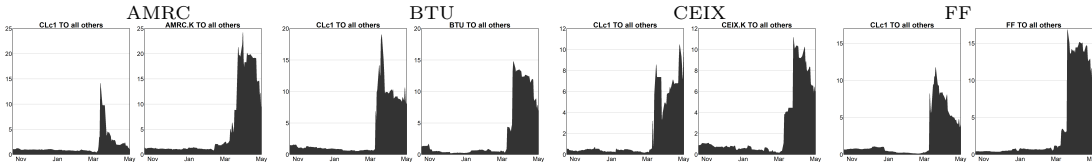

Note: The above Figure represents the total directional volatility spillovers from WTI upon each stated energy sector. To examine spillovers in the volatility of WTI during the outbreak of the COVID-19 pandemic and the subsequent effects of negative oil prices, and the effects of each event on energy-companies in the US, we apply the generalised version of the spillover index.

Figure B3: Net pairwise directional volatility spillovers, absolute returns, 200-day windows

a) Oil & Gas Exploration

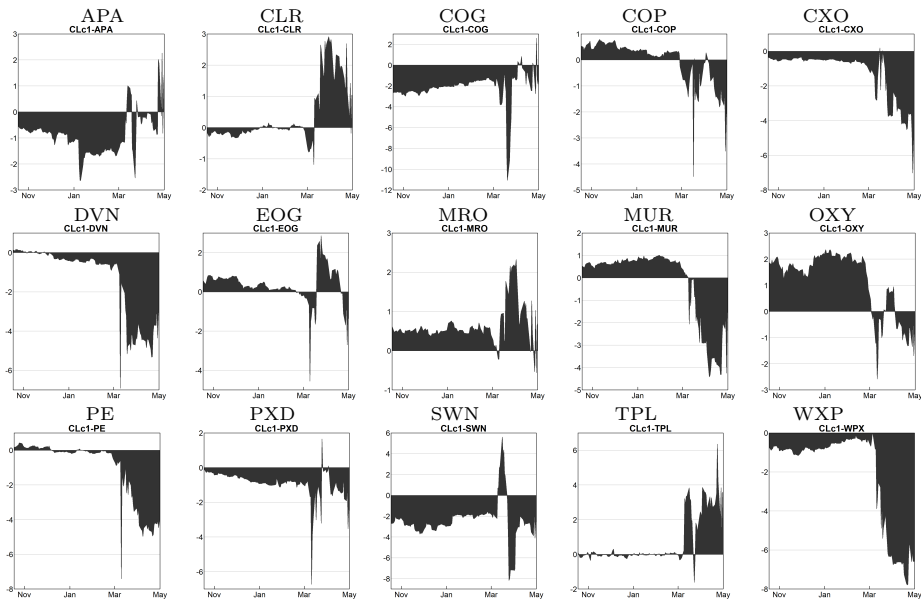

b) Oil & Gas Refining & Marketing

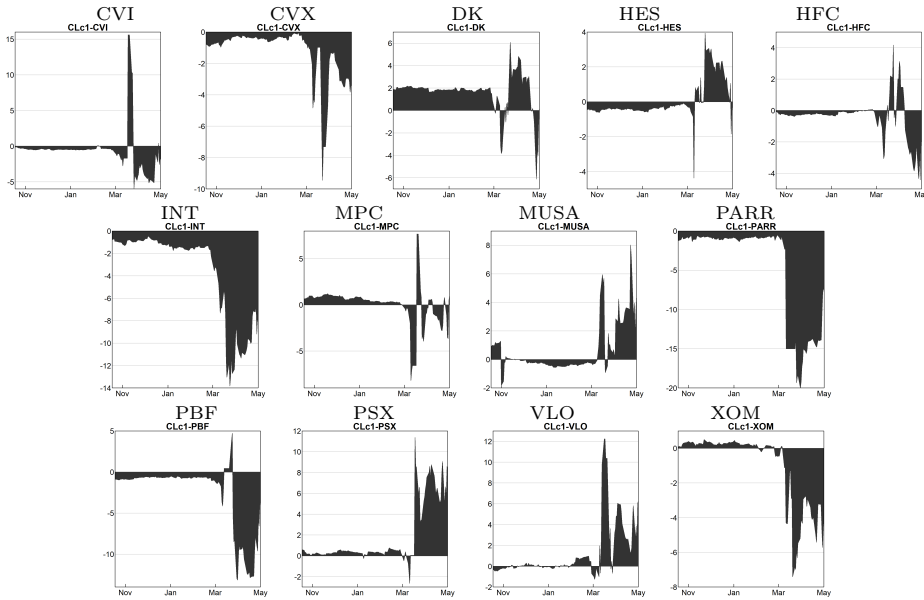

Note: The above Figure represents the net pairwise directional volatility spillovers by stated energy sector. To examine spillovers in the volatility of WTI during the outbreak of the COVID-19 pandemic and the subsequent effects of negative oil prices, and the effects of each event on energy-companies in the US, we apply the generalised version of the spillover index.

Figure B3: Net pairwise directional volatility spillovers, absolute returns, 200-day windows (continued)

c) *Oil-related Service & Equipment*

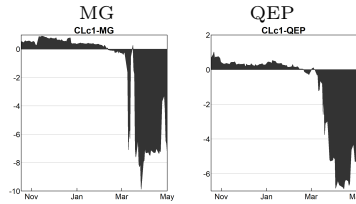

d) *Oil & Gas Transportation Services*

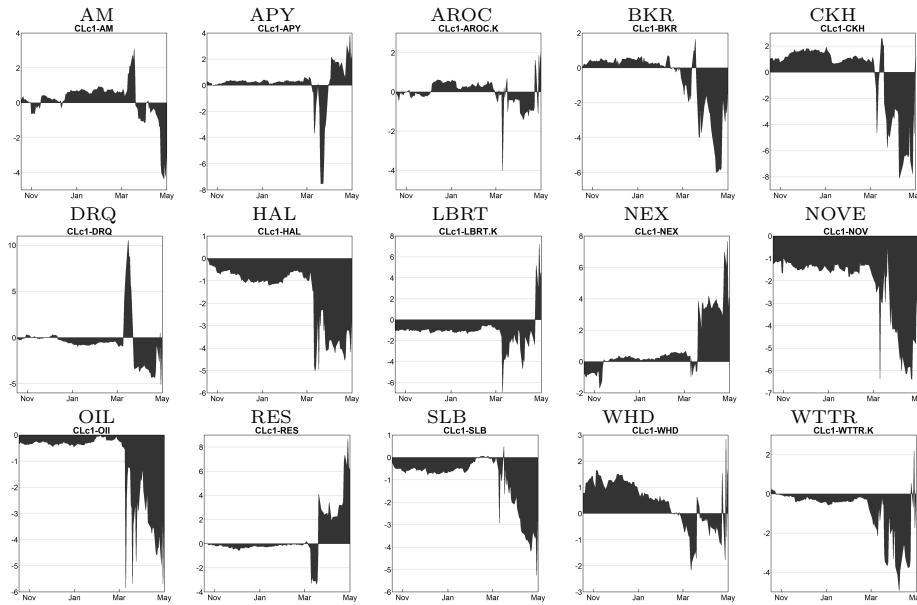

Note: The above Figure represents the net pairwise directional volatility spillovers by stated energy sector. To examine spillovers in the volatility of WTI during the outbreak of the COVID-19 pandemic and the subsequent effects of negative oil prices, and the effects of each event on energy-companies in the US, we apply the generalised version of the spillover index.

Figure B3: Net pairwise directional volatility spillovers, absolute returns, 200-day windows (continued)

e) *Integrated Oil & Gas*

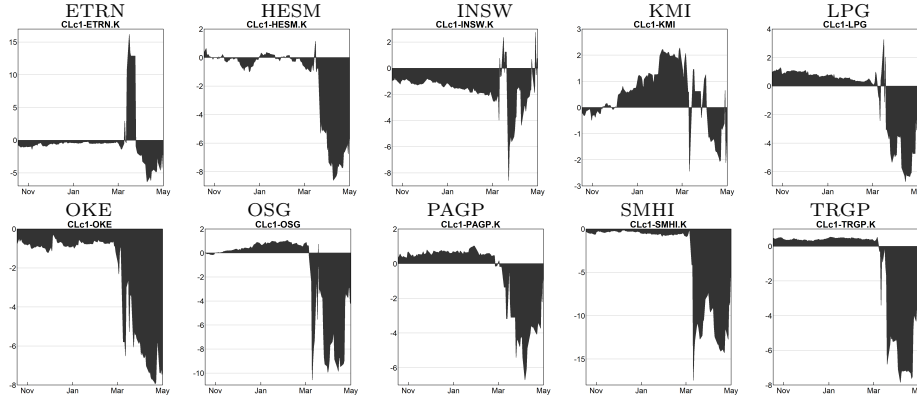

f) *Oil & Gas Drilling*

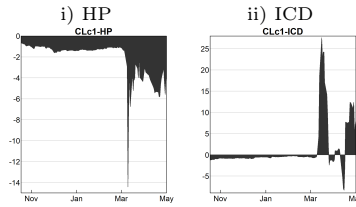

g) *Coal*

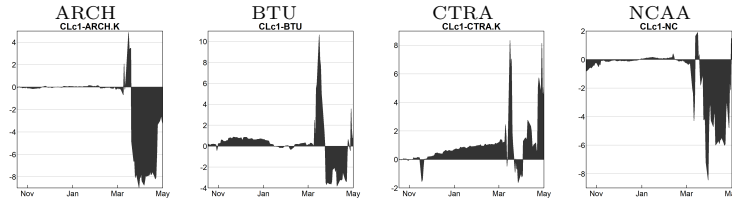

h) *Renewable Energy*

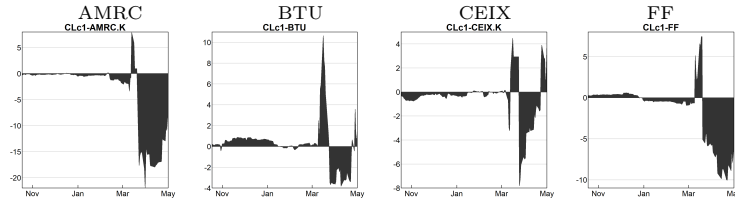

Note: The above Figure represents the net pairwise directional volatility spillovers by stated energy sector. To examine spillovers in the volatility of WTI during the outbreak of the COVID-19 pandemic and the subsequent effects of negative oil prices, and the effects of each event on energy-companies in the US, we apply the generalised version of the spillover index.

## Online Appendices (2/3)

### Co-movements and spillovers of oil and renewable firms under extreme conditions: New evidence from negative WTI prices during COVID-19

---

#### Abstract

We test for the existence of volatility spillovers and co-movements among energy-focused corporations during the outbreak of the COVID-19 pandemic, inclusive of the April 2020 events where West Texas Intermediate (WTI) oil future prices became negative. Employing the spillover index approach; as well as developing a DCC-FIGARCH conditional correlation framework and using estimated spillover indices built on a generalised vector autoregressive framework in which forecast-error variance decompositions are invariant to the variable ordering, we examine the sectoral transmission mechanisms of volatility shocks and contagion throughout the energy sector. Among several results, we find positive and economically meaningful spillovers from falling oil prices to both renewable energy and coal markets. However, this result is only found for the narrow portion of our sample surrounding the negative WTI event. We interpret our results being directly attributed to a sharp drop in global oil, gas and coal demand, rather than because of a sudden increase in oil supply. While investors observed the US fracking industry losing market share to coal, they also viewed renewables as more reliable mechanism to generate long-term, stable and low-cost supply.

*Keywords:* Oil prices; Oil and gas corporations; Volatility spillovers; Volatility co-movement; Market linkage; Financial crisis; Contagion.

---

Figure C1: Total Directional Volatility Spillovers from WTI onto each Analysed Sector, squared returns, 50-day methodology

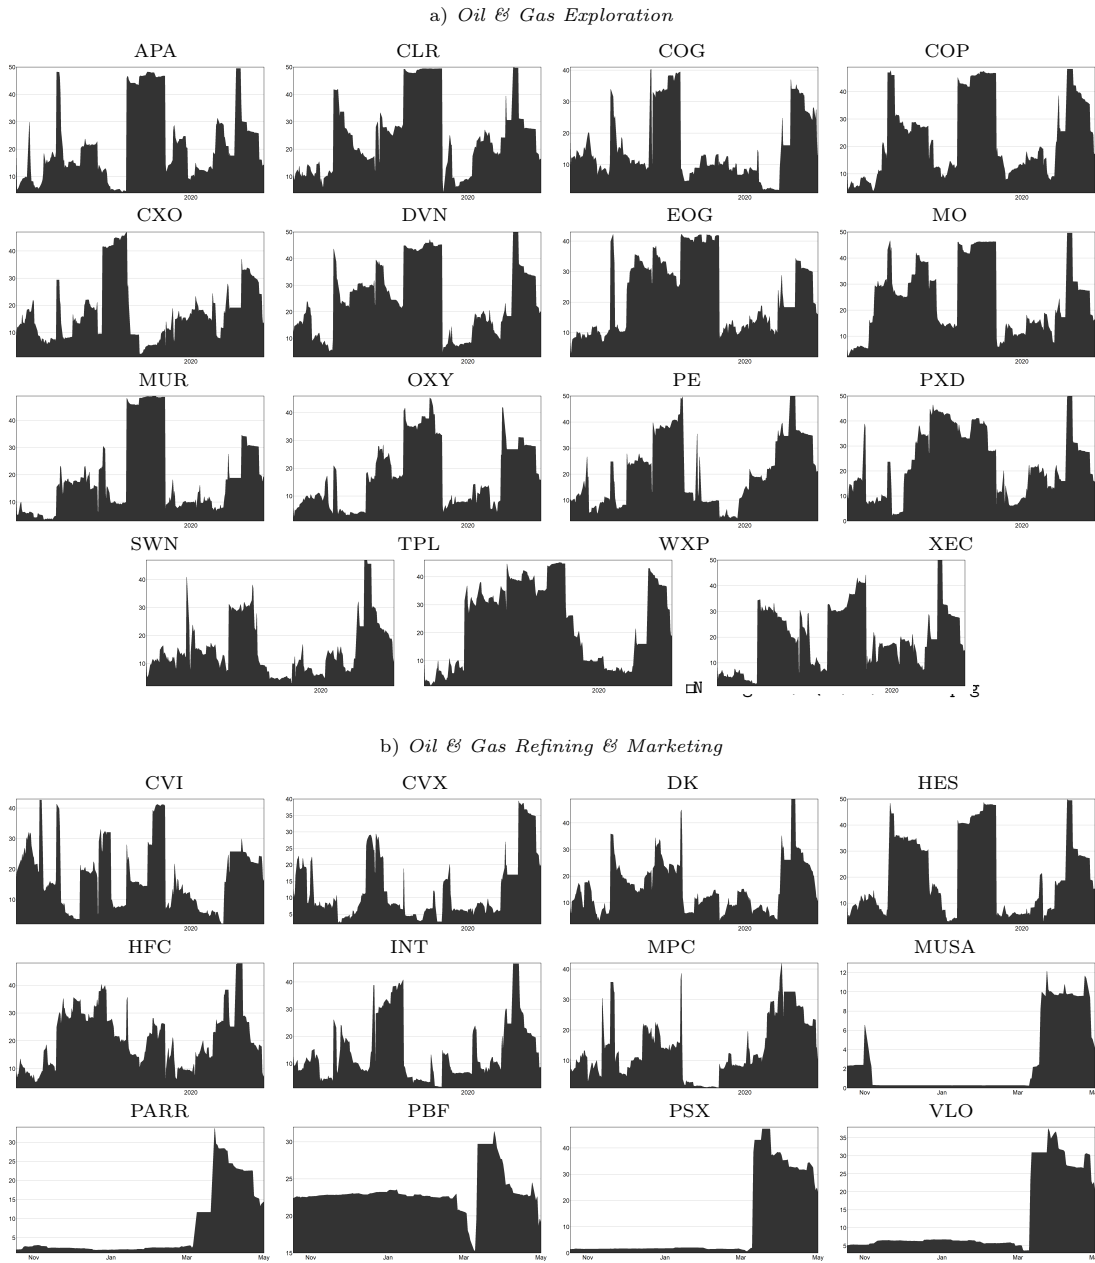

Note: The above Figure represents the total directional volatility spillovers from WTI upon each stated energy sector. To examine spillovers in the volatility of WTI during the outbreak of the COVID-19 pandemic and the subsequent effects of negative oil prices, and the effects of each event on energy-companies in the US, we apply the generalised version of the spillover index.

Figure C1: Total Directional Volatility Spillovers from WTI onto each Analysed Sector, squared returns, 50-day methodology (continued)

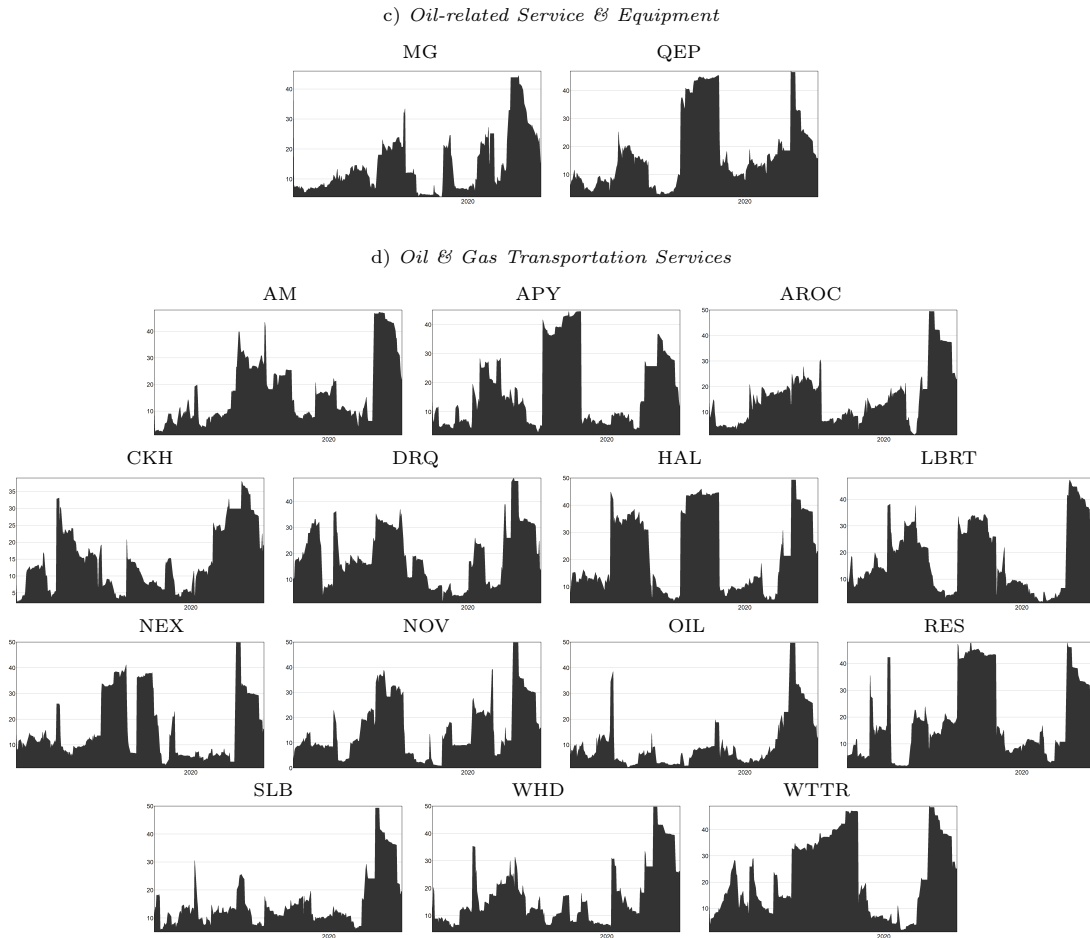

Note: The above Figure represents the total directional volatility spillovers from WTI upon each stated energy sector. To examine spillovers in the volatility of WTI during the outbreak of the COVID-19 pandemic and the subsequent effects of negative oil prices, and the effects of each event on energy-companies in the US, we apply the generalised version of the spillover index.



Figure C1: Total Directional Volatility Spillovers from WTI onto each Analysed Sector, squared returns, 50-day methodology (continued)

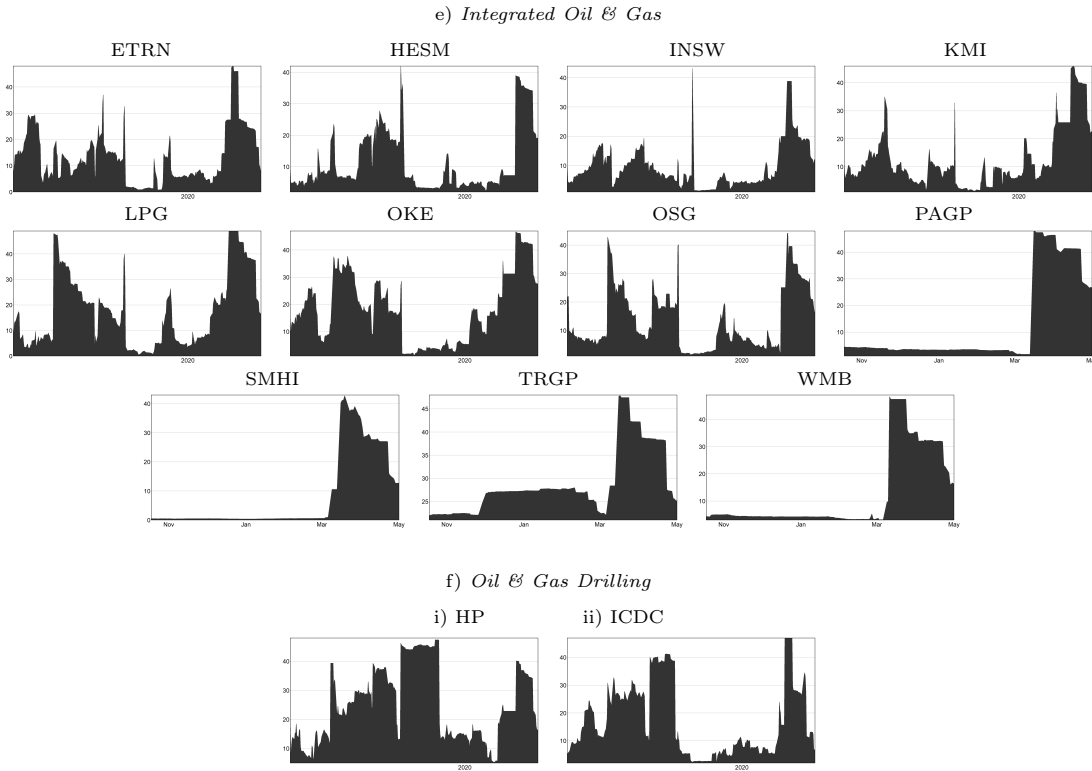

Note: The above Figure represents the total directional volatility spillovers from WTI upon each stated energy sector. To examine spillovers in the volatility of WTI during the outbreak of the COVID-19 pandemic and the subsequent effects of negative oil prices, and the effects of each event on energy-companies in the US, we apply the generalised version of the spillover index.

Figure C1: Total Directional Volatility Spillovers from WTI onto each Analysed Sector, squared returns, 50-day methodology (continued)

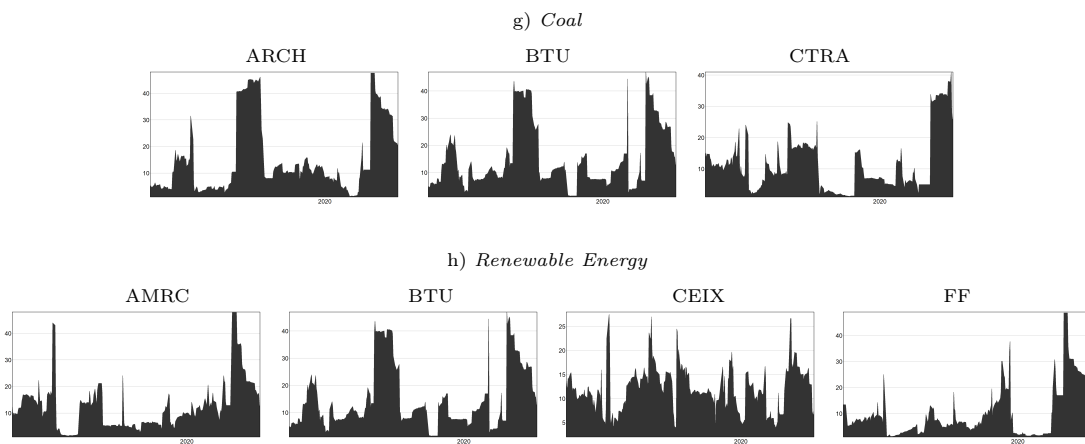

Note: The above Figure represents the total directional volatility spillovers from WTI upon each stated energy sector. To examine spillovers in the volatility of WTI during the outbreak of the COVID-19 pandemic and the subsequent effects of negative oil prices, and the effects of each event on energy-companies in the US, we apply the generalised version of the spillover index.

Figure C2: Total Directional Volatility Spillovers to WTI from each Analysed Sector, squared returns, 50-day methodology

a) Oil & Gas Exploration

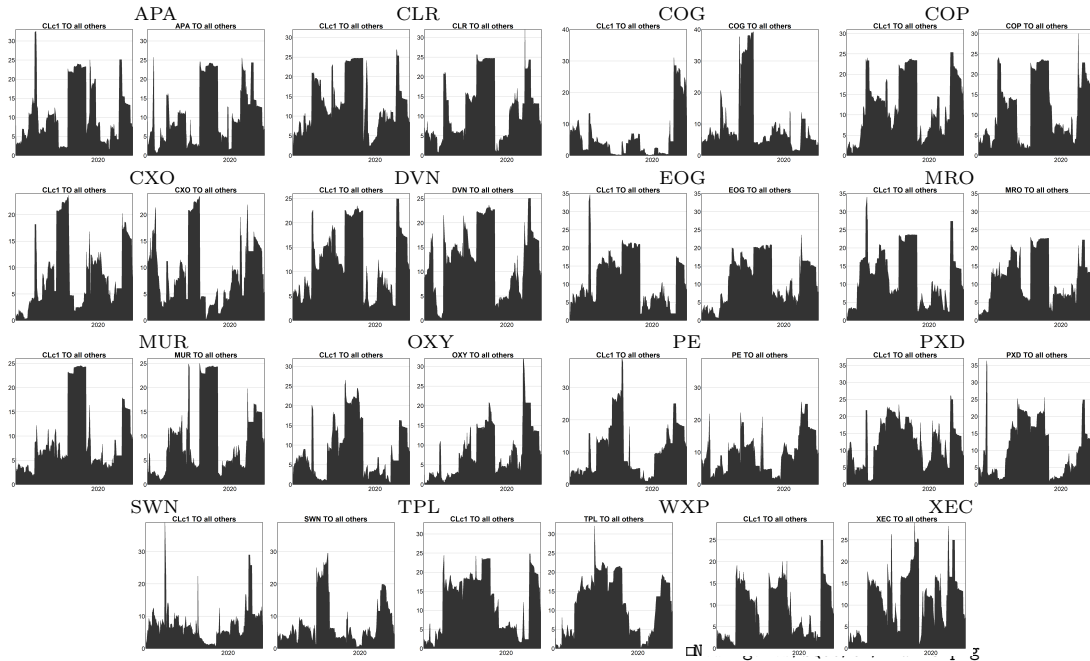

b) Oil & Gas Refining & Marketing

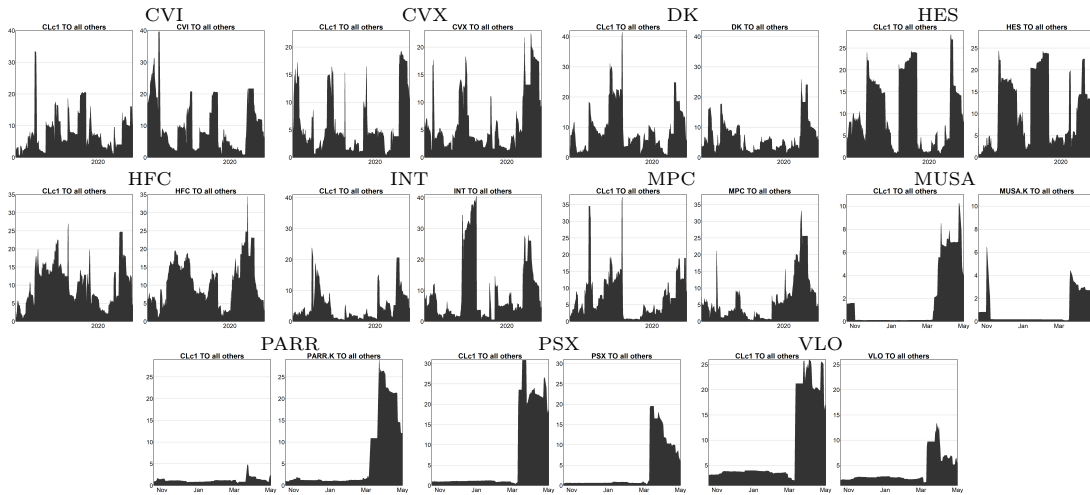

Note: The above Figure represents the total directional volatility spillovers from WTI upon each stated energy sector. To examine spillovers in the volatility of WTI during the outbreak of the COVID-19 pandemic and the subsequent effects of negative oil prices, and the effects of each event on energy-companies in the US, we apply the generalised version of the spillover index.

Figure C2: Total Directional Volatility Spillovers to WTI from each Analysed Sector, squared returns, 50-day methodology (continued)

c) *Oil-related Service & Equipment*

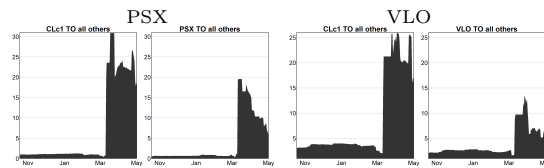

d) *Oil & Gas Transportation Services*

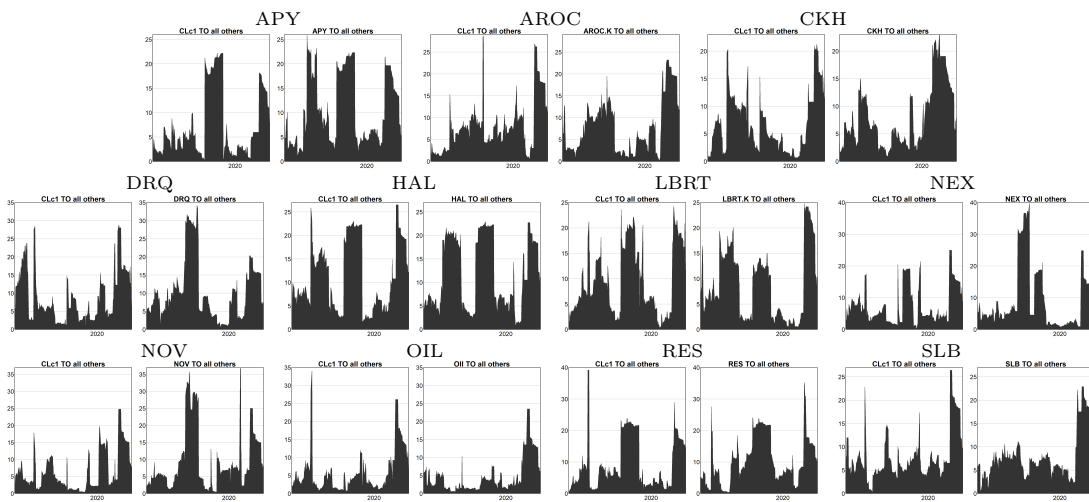

Note: The above Figure represents the total directional volatility spillovers from WTI upon each stated energy sector. To examine spillovers in the volatility of WTI during the outbreak of the COVID-19 pandemic and the subsequent effects of negative oil prices, and the effects of each event on energy-companies in the US, we apply the generalised version of the spillover index.

Figure C2: Total Directional Volatility Spillovers to WTI from each Analysed Sector, squared returns, 50-day methodology (continued)

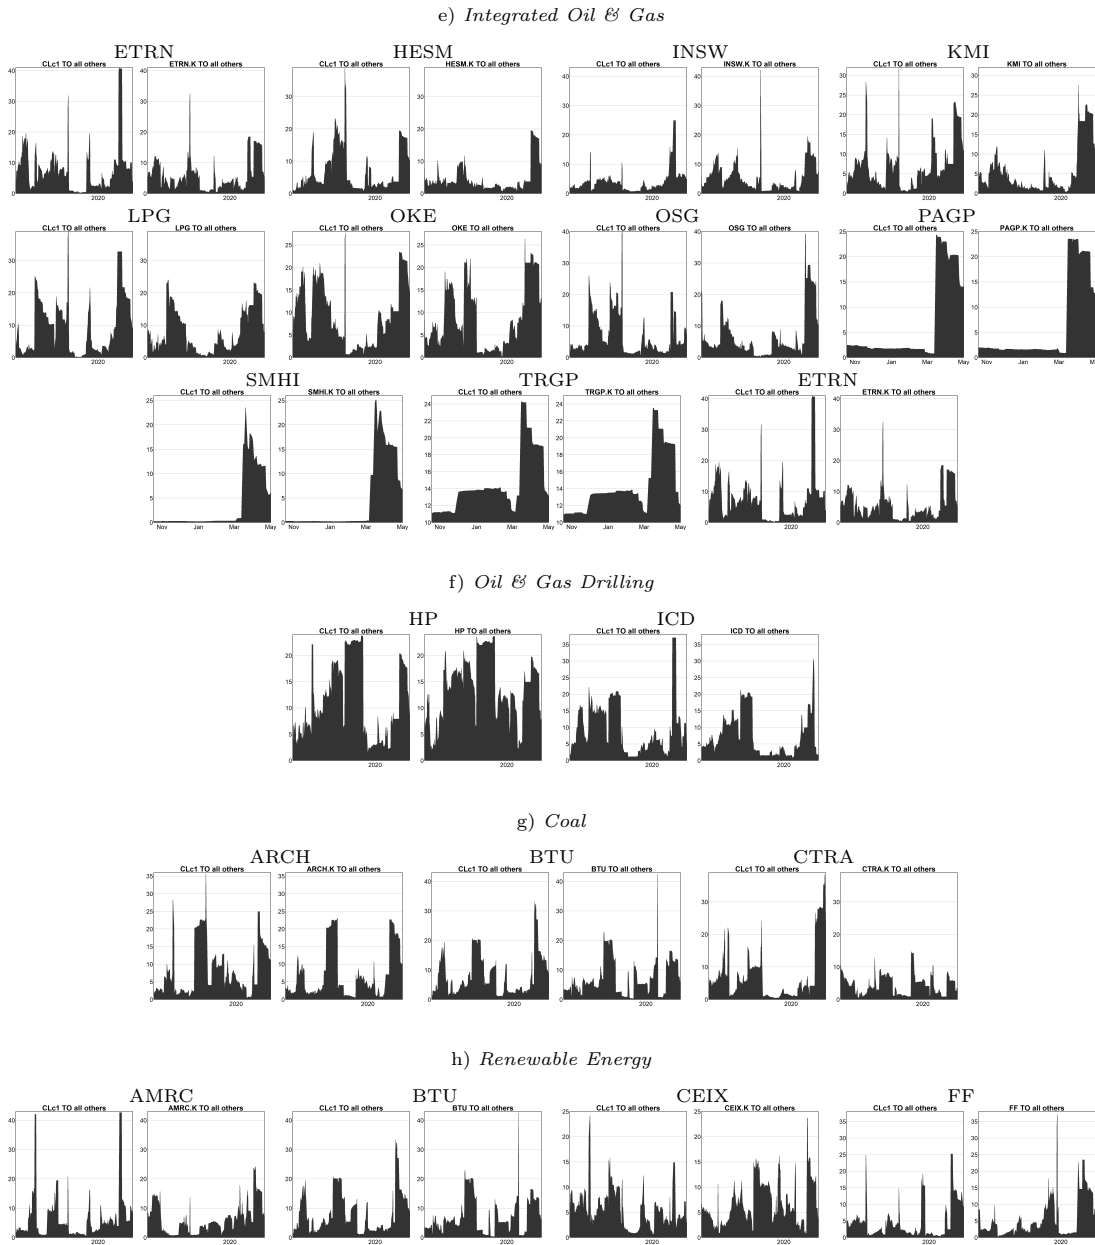

Note: The above Figure represents the total directional volatility spillovers from WTI upon each stated energy sector. To examine spillovers in the volatility of WTI during the outbreak of the COVID-19 pandemic and the subsequent effects of negative oil prices, and the effects of each event on energy-companies in the US, we apply the generalised version of the spillover index.

Figure C3: Net pairwise directional volatility spillovers, squared returns, 50-day methodology

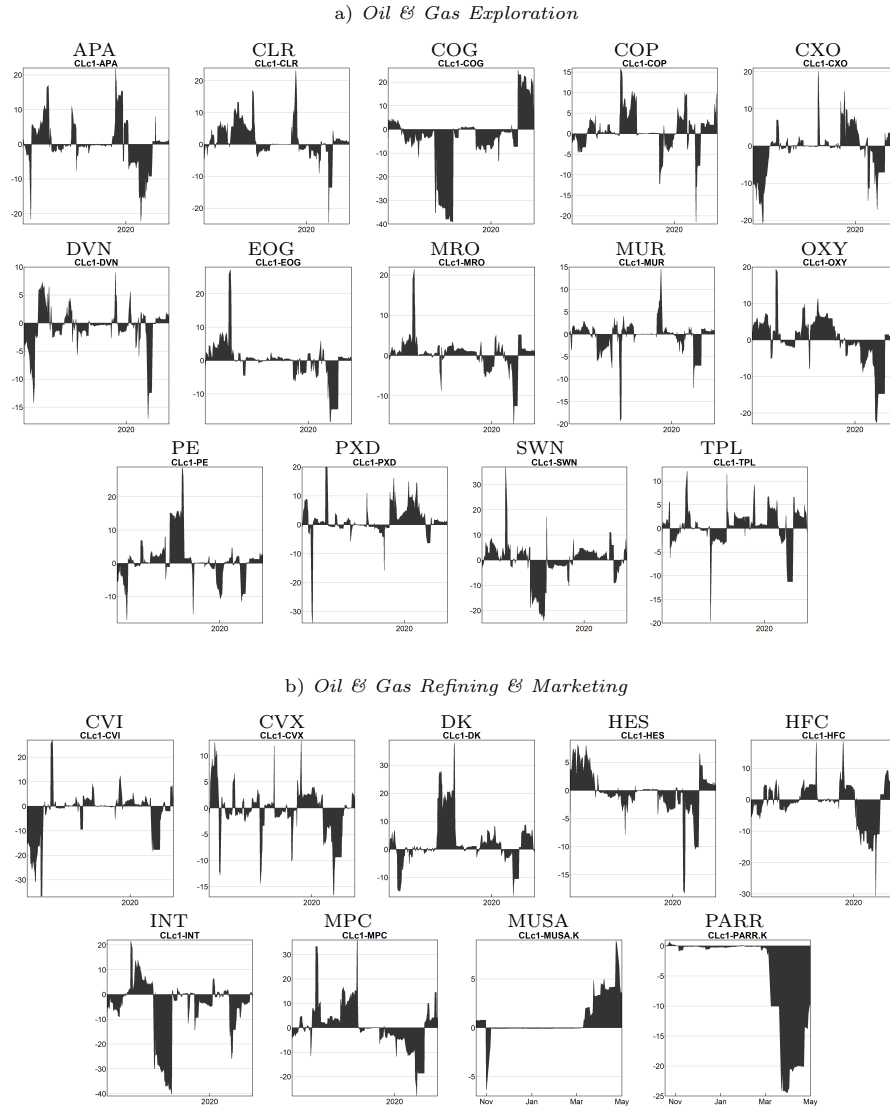

Note: The above Figure represents the net pairwise directional volatility spillovers by stated energy sector. To examine spillovers in the volatility of WTI during the outbreak of the COVID-19 pandemic and the subsequent effects of negative oil prices, and the effects of each event on energy-companies in the US, we apply the generalised version of the spillover index.

Figure C3: Net pairwise directional volatility spillovers, squared returns, 50-day methodology (continued)

c) *Oil-related Service & Equipment*

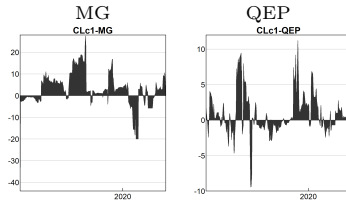

d) *Oil & Gas Transportation Services*

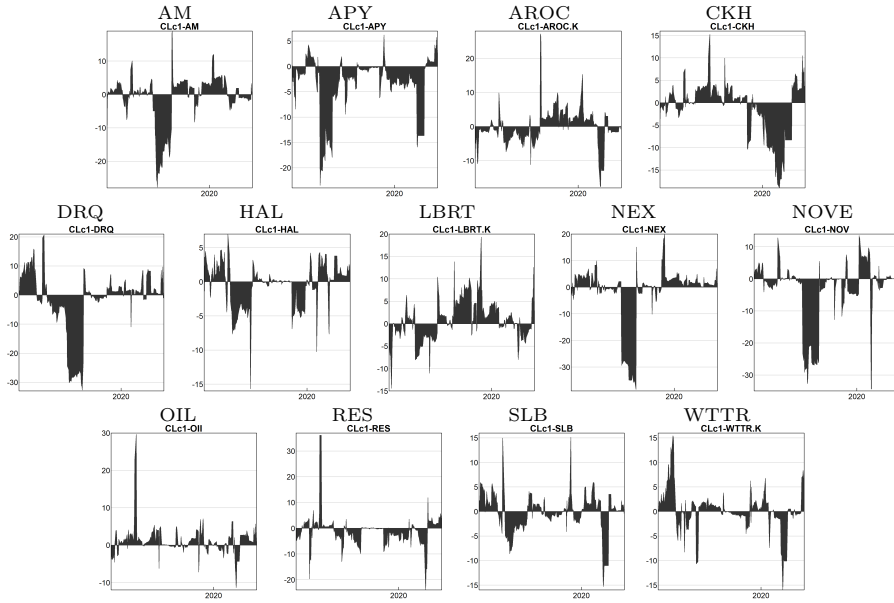

Note: The above Figure represents the net pairwise directional volatility spillovers by stated energy sector. To examine spillovers in the volatility of WTI during the outbreak of the COVID-19 pandemic and the subsequent effects of negative oil prices, and the effects of each event on energy-companies in the US, we apply the generalised version of the spillover index.

Figure C3: Net pairwise directional volatility spillovers, squared returns, 50-day methodology (continued)

e) *Integrated Oil & Gas*

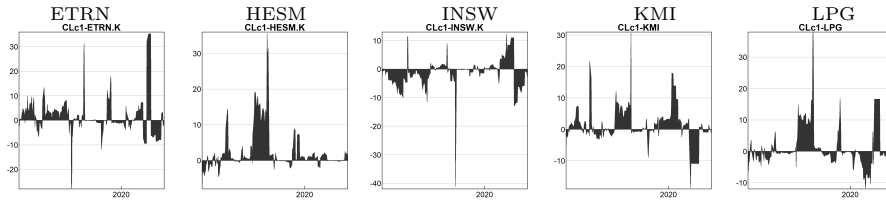

f) *Oil & Gas Drilling*

i) ICD

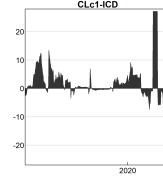

g) *Coal*

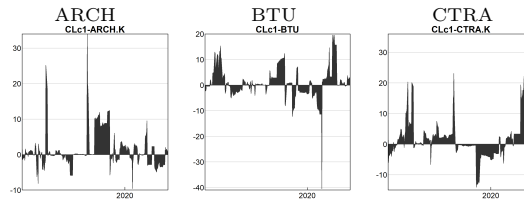

h) *Renewable Energy*

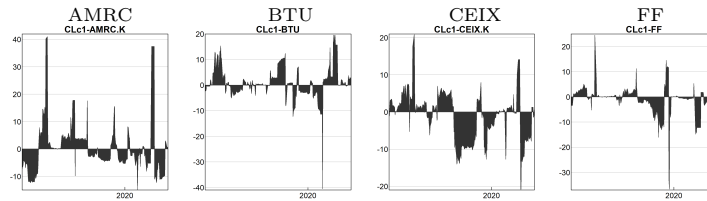

Note: The above Figure represents the net pairwise directional volatility spillovers by stated energy sector. To examine spillovers in the volatility of WTI during the outbreak of the COVID-19 pandemic and the subsequent effects of negative oil prices, and the effects of each event on energy-companies in the US, we apply the generalised version of the spillover index.



## Online Appendices (3/3)

### Co-movements and spillovers of oil and renewable firms under extreme conditions: New evidence from negative WTI prices during COVID-19

---

#### Abstract

We test for the existence of volatility spillovers and co-movements among energy-focused corporations during the outbreak of the COVID-19 pandemic, inclusive of the April 2020 events where West Texas Intermediate (WTI) oil future prices became negative. Employing a spillover index approach as well as developing a DCC-FIGARCH conditional correlation framework and using estimated spillover indices built on a generalised vector autoregressive framework in which forecast-error variance decompositions are invariant to the variable ordering, we examine the sectoral transmission mechanisms of volatility shocks and contagion throughout the energy sector. Among several results, we find positive and economically meaningful spillovers from falling oil prices to both renewable energy and coal markets. However, this result is only found for the narrow portion of our sample surrounding the negative WTI event. We interpret our results being directly attributed to a sharp drop in global oil, gas and coal demand, rather than because of a sudden increase in oil supply. While investors observed the US fracking industry losing market share to coal, they also viewed renewables as more reliable mechanism to generate long-term, stable and low-cost supply.

*Keywords:* Oil prices; Oil and gas corporations; Volatility spillovers; Volatility co-movement; Market linkage; Financial crisis; Contagion.

---

Figure D1: Total Directional Volatility Spillovers from WTI onto each Analysed Sector, squared returns, 200-day methodology

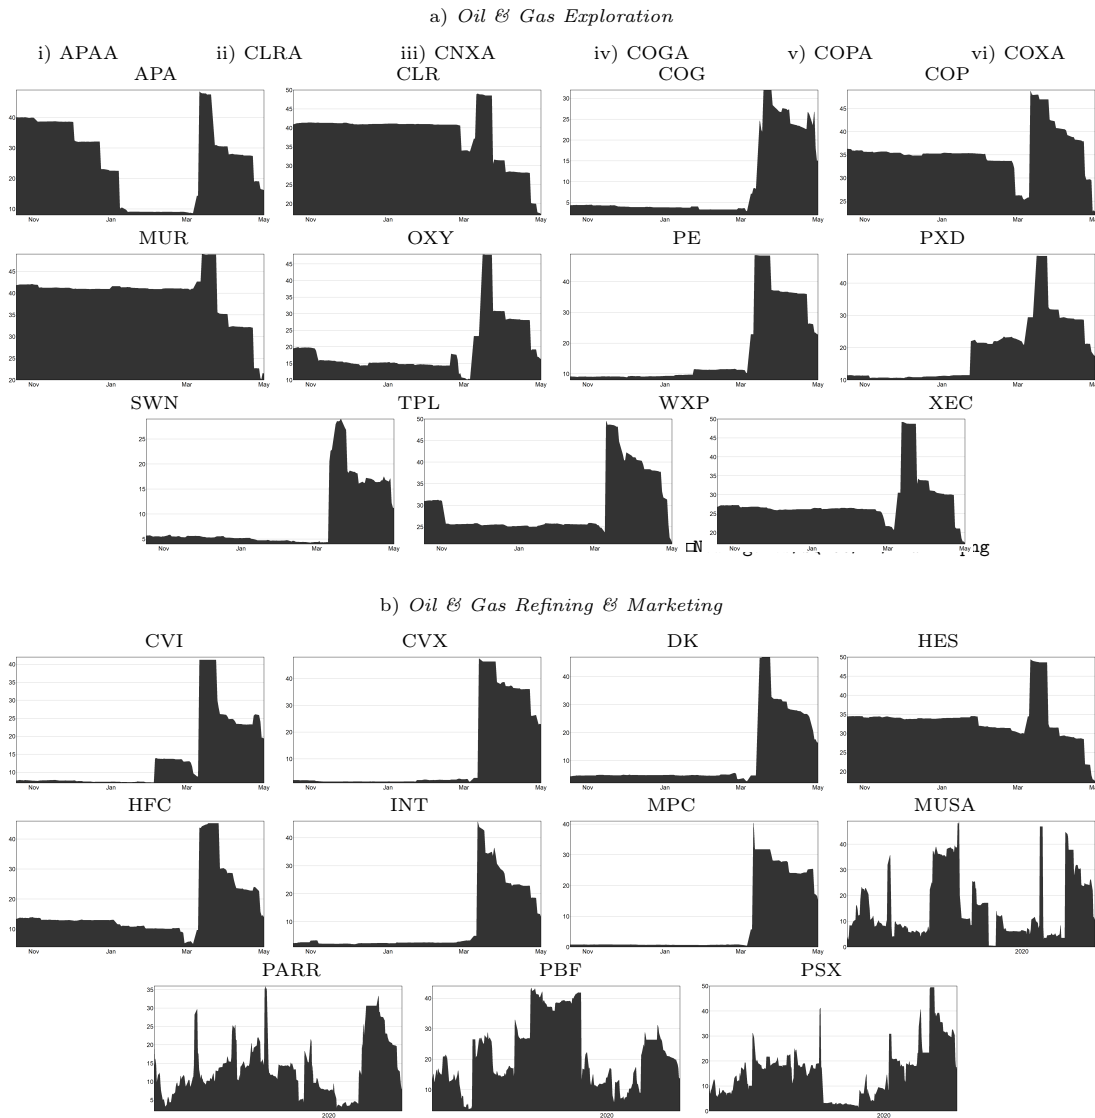

Note: The above Figure represents the total directional volatility spillovers from WTI upon each stated energy sector. To examine spillovers in the volatility of WTI during the outbreak of the COVID-19 pandemic and the subsequent effects of negative oil prices, and the effects of each event on energy-companies in the US, we apply the generalised version of the spillover index.

Figure B1: Total Directional Volatility Spillovers from WTI onto each Analysed Sector, absolute returns, 200-day windows

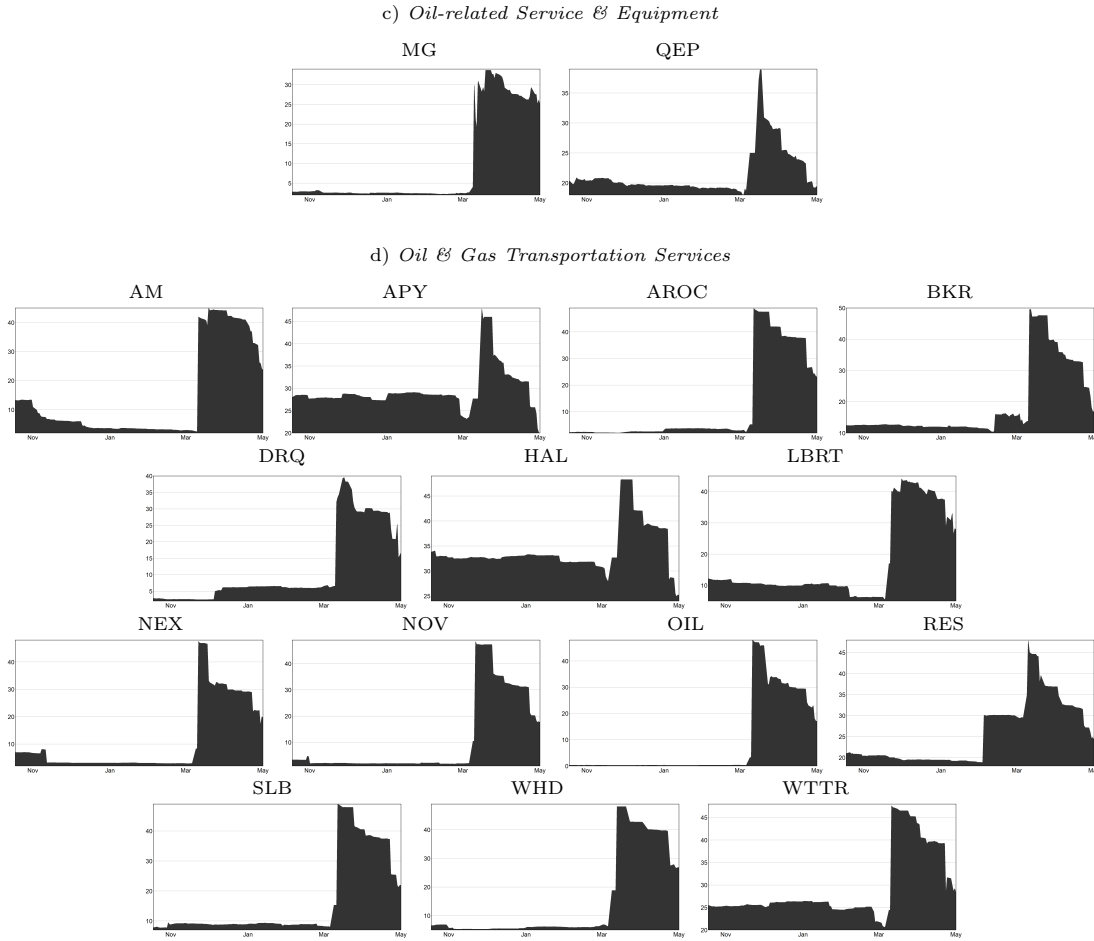

Note: The above Figure represents the total directional volatility spillovers from WTI upon each stated energy sector. To examine spillovers in the volatility of WTI during the outbreak of the COVID-19 pandemic and the subsequent effects of negative oil prices, and the effects of each event on energy-companies in the US, we apply the generalised version of the spillover index.

Figure B1: Total Directional Volatility Spillovers from WTI onto each Analysed Sector, absolute returns, 200-day windows

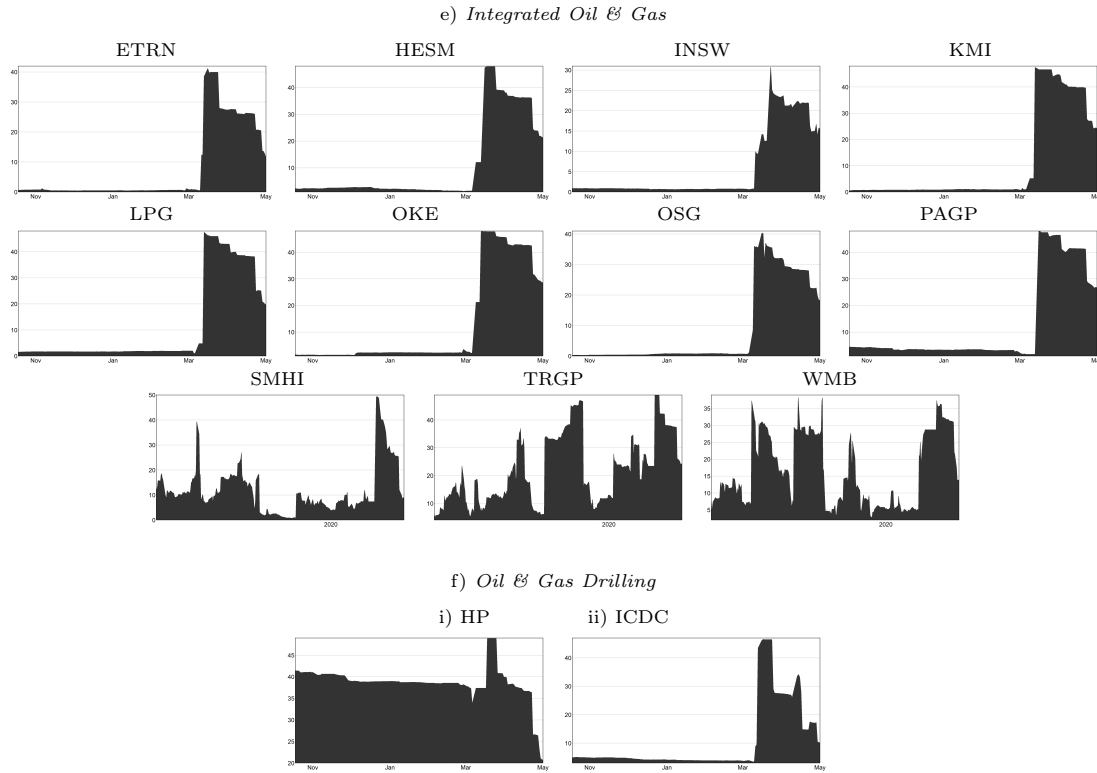

Note: The above Figure represents the total directional volatility spillovers from WTI upon each stated energy sector. To examine spillovers in the volatility of WTI during the outbreak of the COVID-19 pandemic and the subsequent effects of negative oil prices, and the effects of each event on energy-companies in the US, we apply the generalised version of the spillover index.

Figure B1: Total Directional Volatility Spillovers from WTI onto each Analysed Sector, absolute returns, 200-day windows

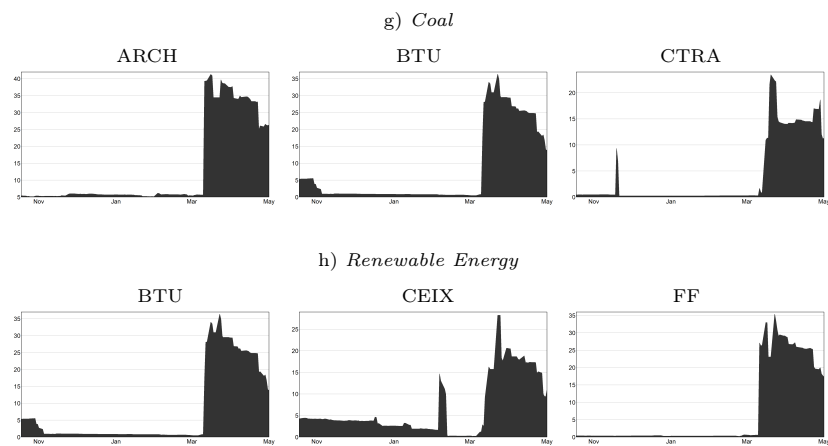

Note: The above Figure represents the total directional volatility spillovers from WTI upon each stated energy sector. To examine spillovers in the volatility of WTI during the outbreak of the COVID-19 pandemic and the subsequent effects of negative oil prices, and the effects of each event on energy-companies in the US, we apply the generalised version of the spillover index.

Figure D2: Total Directional Volatility Spillovers to WTI from each Analysed Sector, squared returns, 200-day methodology

a) Oil & Gas Exploration

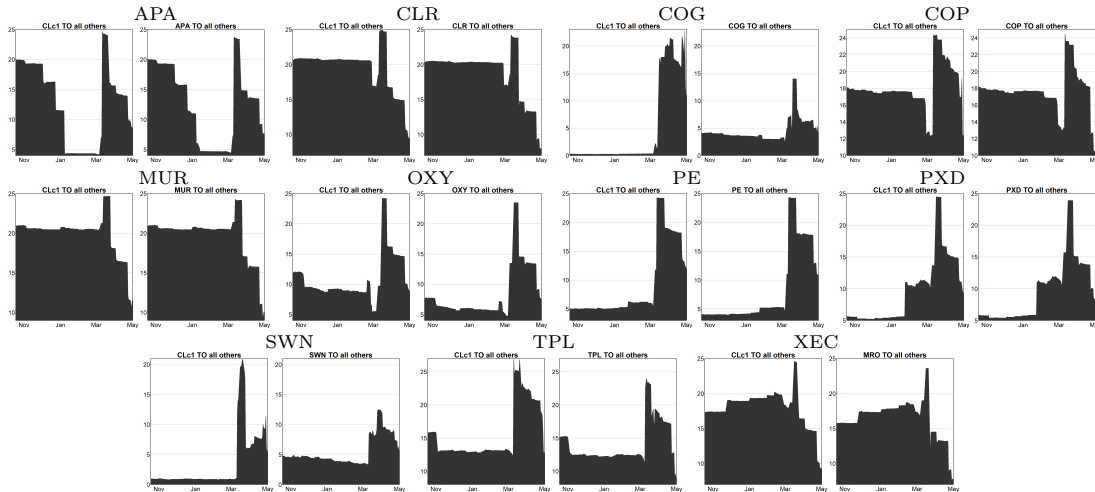

b) Oil & Gas Refining & Marketing

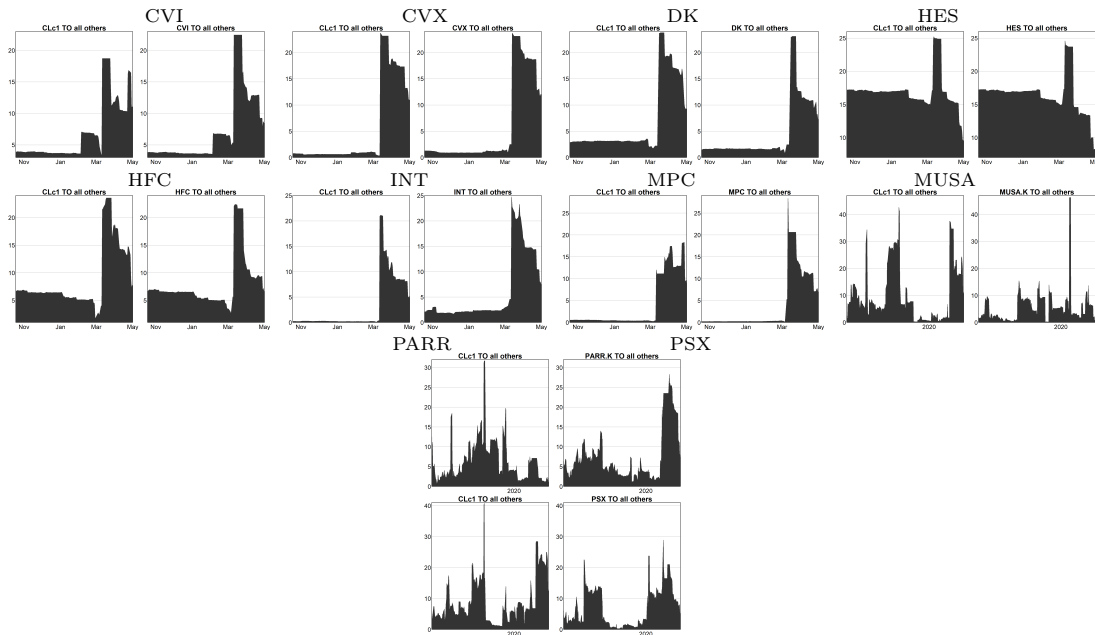

Note: The above Figure represents the total directional volatility spillovers from WTI upon each stated energy sector. To examine spillovers in the volatility of WTI during the outbreak of the COVID-19 pandemic and the subsequent effects of negative oil prices, and the effects of each event on energy-companies in the US, we apply the generalised version of the spillover index.

Figure D2: Total Directional Volatility Spillovers to WTI from each Analysed Sector, squared returns, 200-day methodology (continued)

c) Oil-related Service & Equipment

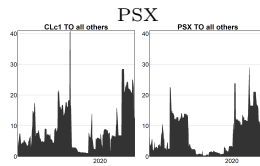

d) Oil & Gas Transportation Services

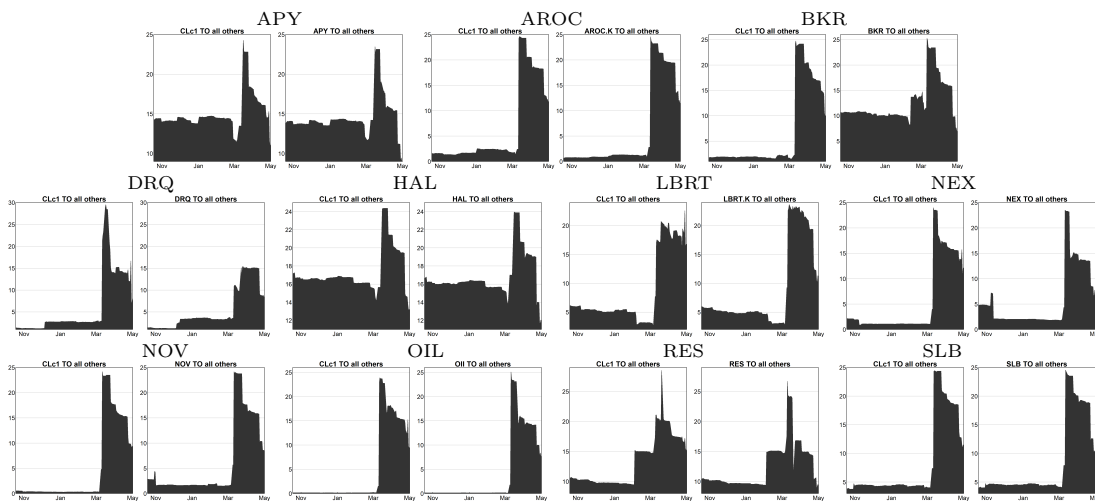

Note: The above Figure represents the total directional volatility spillovers from WTI upon each stated energy sector. To examine spillovers in the volatility of WTI during the outbreak of the COVID-19 pandemic and the subsequent effects of negative oil prices, and the effects of each event on energy-companies in the US, we apply the generalised version of the spillover index.

Figure D2: Total Directional Volatility Spillovers to WTI from each Analysed Sector, squared returns, 200-day methodology (continued)

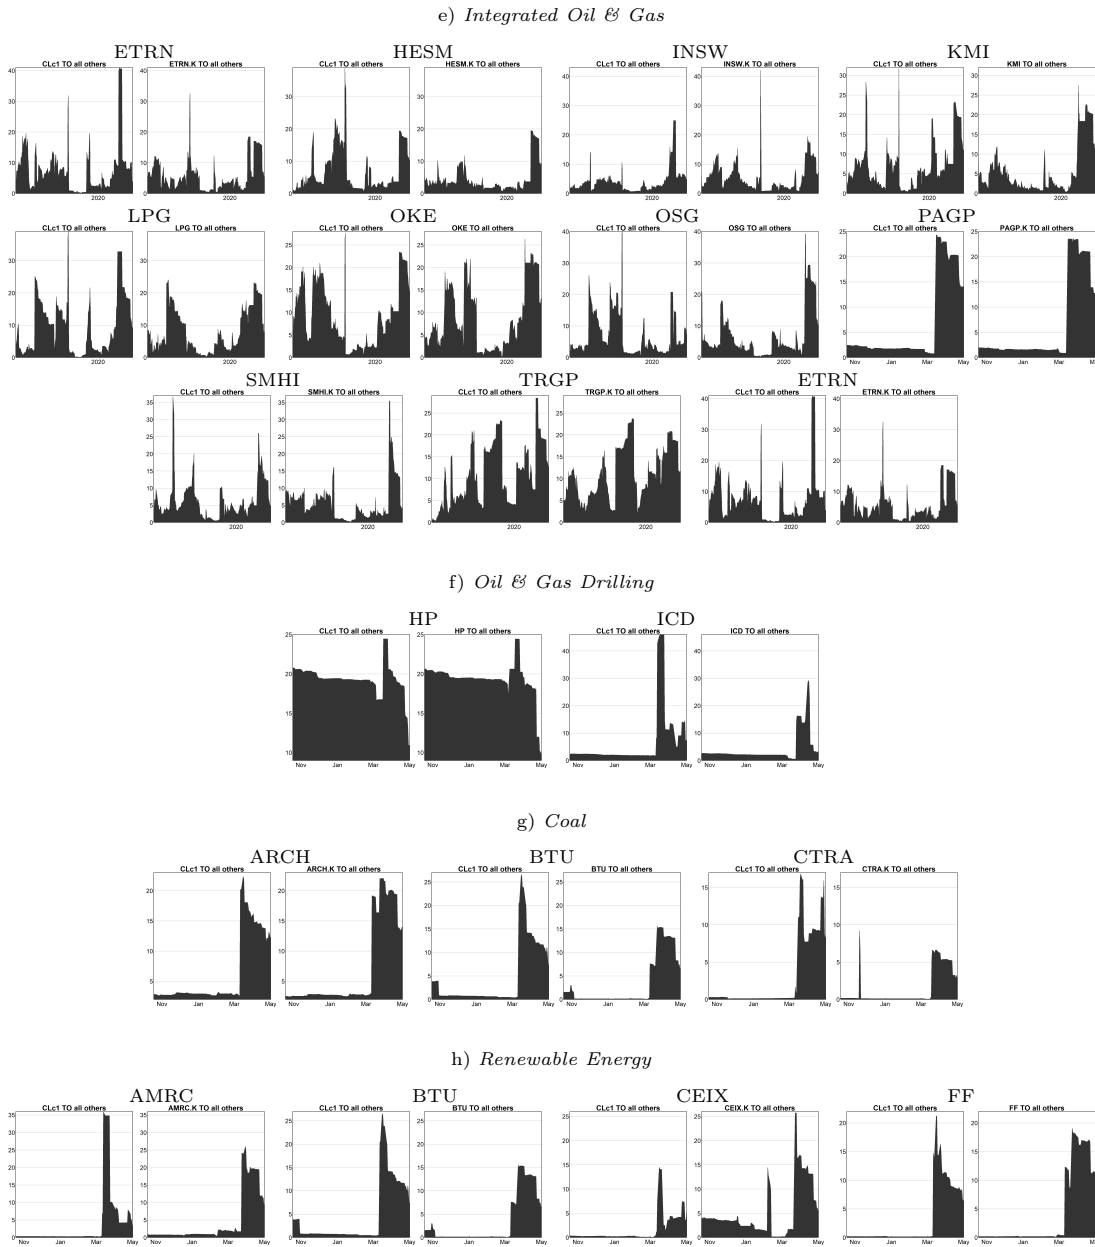

Note: The above Figure represents the total directional volatility spillovers from WTI upon each stated energy sector. To examine spillovers in the volatility of WTI during the outbreak of the COVID-19 pandemic and the subsequent effects of negative oil prices, and the effects of each event on energy-companies in the US, we apply the generalised version of the spillover index.



Figure D3: Net pairwise directional volatility spillovers, squared returns, 200-day methodology

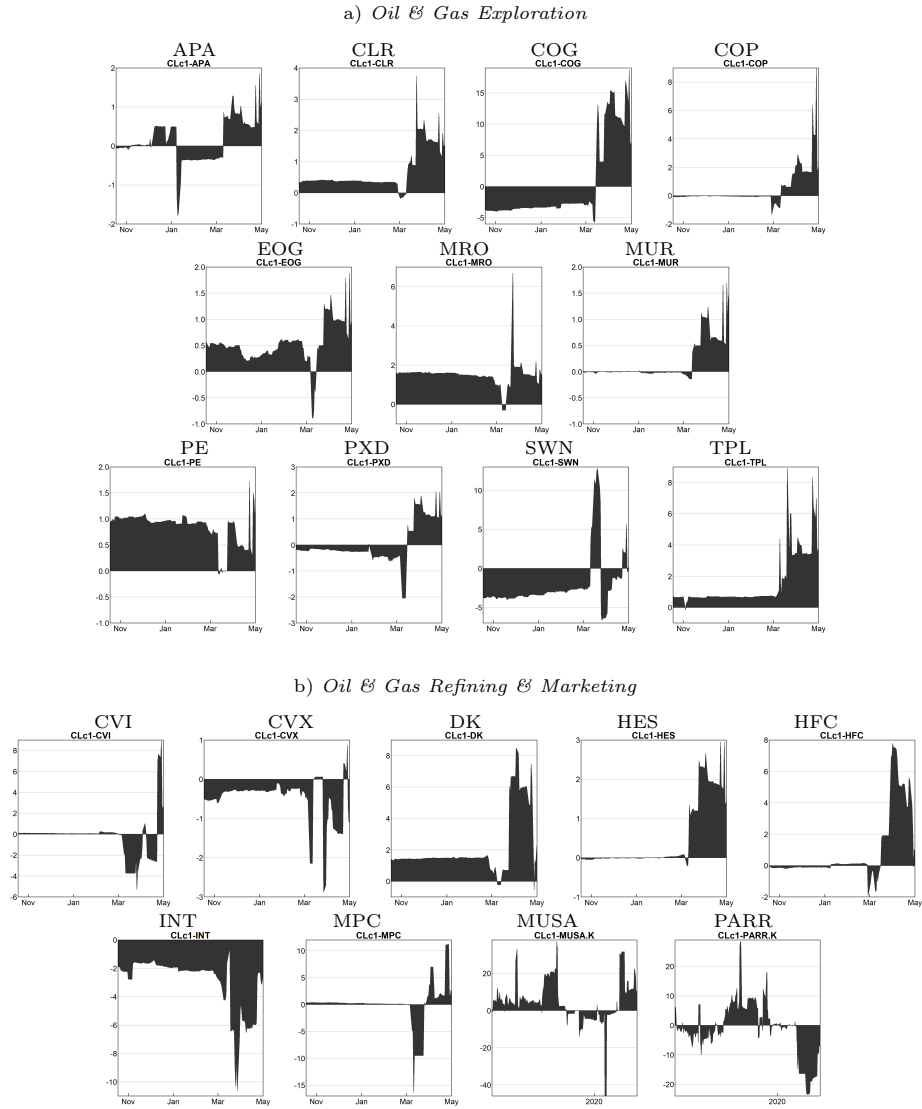

Note: The above Figure represents the net pairwise directional volatility spillovers by stated energy sector. To examine spillovers in the volatility of WTI during the outbreak of the COVID-19 pandemic and the subsequent effects of negative oil prices, and the effects of each event on energy-companies in the US, we apply the generalised version of the spillover index.

Figure D3: Net pairwise directional volatility spillovers, squared returns, 200-day methodology (continued)

c) *Oil-related Service & Equipment*

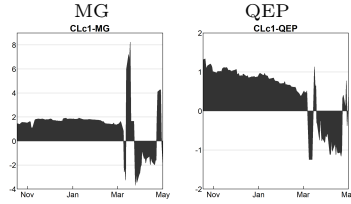

d) *Oil & Gas Transportation Services*

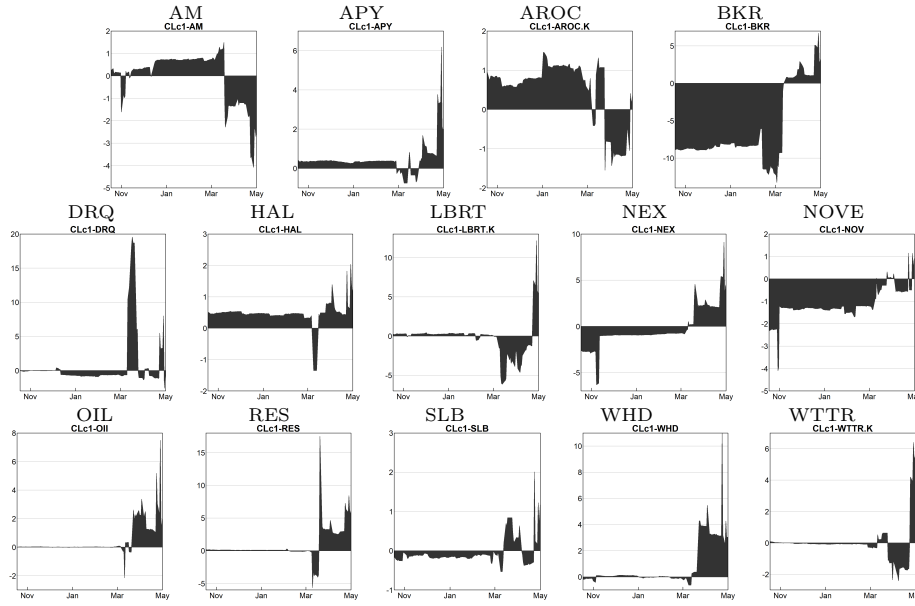

Note: The above Figure represents the net pairwise directional volatility spillovers by stated energy sector. To examine spillovers in the volatility of WTI during the outbreak of the COVID-19 pandemic and the subsequent effects of negative oil prices, and the effects of each event on energy-companies in the US, we apply the generalised version of the spillover index.

Figure D3: Net pairwise directional volatility spillovers, squared returns, 200-day methodology (continued)

e) *Integrated Oil & Gas*

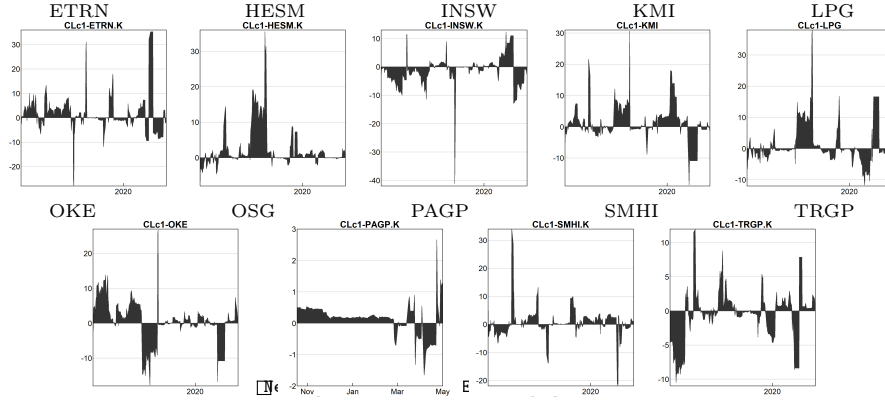

f) *Oil & Gas Drilling*

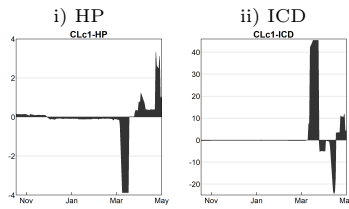

g) *Coal*

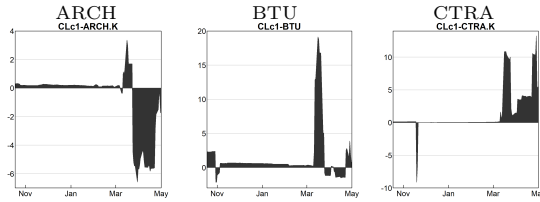

h) *Renewable Energy*

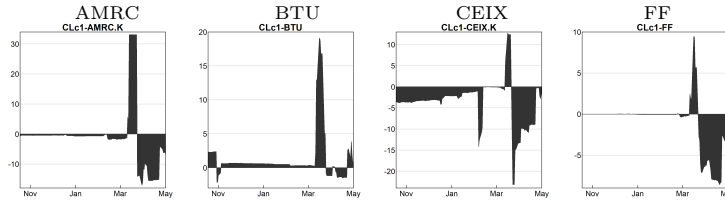

Note: The above Figure represents the net pairwise directional volatility spillovers by stated energy sector. To examine spillovers in the volatility of WTI during the outbreak of the COVID-19 pandemic and the subsequent effects of negative oil prices, and the effects of each event on energy-companies in the US, we apply the generalised version of the spillover index.
